# Supplementary material for: Differential Effects of Human Tau Isoforms to Neuronal Dysfunction and Toxicity in the Drosophila CNS
Source: MDPI journal article supplement (doi:10.3390/ijms232112985), 2022-10-26
Supplement: s1 [file s1]

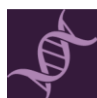

Supplementary

# Differential Effects of Human Tau Isoforms to Neuronal Dysfunction and Toxicity in the Drosophila CNS

Ergina Vourkou <sup>1,2,†</sup>, Vassilis Paspaliaris <sup>1,3,†</sup>, Anna Bourouliti <sup>1,4</sup>, Maria-Christina Zerva <sup>1,5</sup>, Engie Prifti <sup>1,6</sup>, Katerina Papanikolopoulou <sup>1,\*</sup> and Efthimios M. C. Skoulakis <sup>1,\*</sup>

<sup>1</sup> Institute for Fundamental Biomedical Research, Biomedical Sciences Research Centre “Alexander Fleming”, 16672 Vari, Greece

<sup>2</sup> School of Medicine, National and Kapodistrian University of Athens, 11527 Athens, 2nd Department of Neurology, “Attikon” General University Hospital, 12462 Athens, Greece

<sup>3</sup> Laboratory of Experimental Physiology, School of Medicine, National and Kapodistrian University of Athens, 11527 Athens, Greece

<sup>4</sup> Department of Molecular Biology and Genetics, Democritus University of Thrace, 68100 Alexandroupolis, Greece

<sup>5</sup> Athens International Master’s Program in Neurosciences, Department of Biology, National and Kapodistrian University of Athens, 15784 Athens, Greece

<sup>6</sup> Department of Biotechnology, Agricultural University of Athens, 11855 Athens, Greece

\* Correspondence: papanikolopoulou@fleming.gr (K.P.); skoulakis@fleming.gr (E.M.C.S.)

† These authors contributed equally to this work.

**Citation:** Vourkou, E.; Paspaliaris, V.; Bourouliti, A.; Zerva, M.-C.; Prifti, E.; Papanikolopoulou, K.; Skoulakis, E.M.C. Differential Effects of Human Tau Isoforms to Neuronal Dysfunction and Toxicity in the Drosophila CNS. *Int. J. Mol. Sci.* **2022**, *23*, 12985. <https://doi.org/10.3390/ijms232112985>

Academic Editor(s): Isidro Ferrer

Received: 19 September 2022

Accepted: 19 October 2022

Published: date

**Publisher’s Note:** MDPI stays neutral with regard to jurisdictional claims in published maps and institutional affiliations.

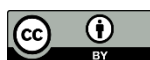

**Copyright:** © 2022 by the authors. Licensee MDPI, Basel, Switzerland. This article is an open access article distributed under the terms and conditions of the Creative Commons Attribution (CC BY) license (<https://creativecommons.org/licenses/by/4.0/>).

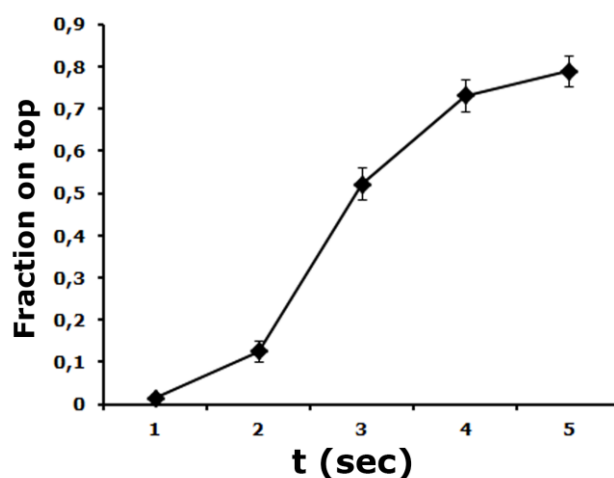

**Supplemental Figure S1.** A “standard curve” of top upper compartment occupation.

The proportion of flies reported as a mean  $\pm$  SEM in the top upper compartment as a function of time after forcing a population of 10–12 flies to the bottom of the vial. n=19

**Supplemental Table S1.**

ANOVAs and subsequent LSM-planned comparisons for the ratios of densitometrically determined protein (**Fig.1A**) or mRNA (**Fig.1B**) levels of each of the six hTau isoforms normalized for loading with Syntaxin (**A**) or *rp49* (**B**). Significant differences are highlighted in bold.

| Statistical details from Figure 1                       |                 |         |               |
|---------------------------------------------------------|-----------------|---------|---------------|
| Genotype                                                | Mean ± SEM      | F-Ratio | p             |
| <b>Figure 1A</b> ANOVA $F_{(5,17)}=5.7256$ , $p=0.0063$ |                 |         |               |
| Elav <sup>C155</sup> -Gal4 >0N3R                        | 0.5079 ± 0.0992 |         |               |
| Elav <sup>C155</sup> -Gal4 >1N3R                        | 0.9109 ± 0.1852 | 4.4104  | 0.0575        |
| Elav <sup>C155</sup> -Gal4 >2N3R                        | 0.4788 ± 0.0966 | 0.0230  | 0.8818        |
| Elav <sup>C155</sup> -Gal4 >0N4R                        | 0.9860 ± 0.2017 | 6.2080  | <b>0.0283</b> |
| Elav <sup>C155</sup> -Gal4 >1N4R                        | 1.2739 ± 0.0930 | 15.936  | <b>0.0018</b> |
| Elav <sup>C155</sup> -Gal4 >2N4R                        | 0.5375 ± 0.0875 | 0.0238  | 0.8799        |
|                                                         |                 |         |               |
| Elav <sup>C155</sup> -Gal4 >1N3R                        | 0.9109 ± 0.1852 |         |               |
| Elav <sup>C155</sup> -Gal4 >2N3R                        | 0.4788 ± 0.0966 | 5.0711  | <b>0.0438</b> |
| Elav <sup>C155</sup> -Gal4 >0N4R                        | 0.9860 ± 0.2017 | 0.1533  | 0.7023        |
| Elav <sup>C155</sup> -Gal4 >1N4R                        | 1.2739 ± 0.0930 | 3.5793  | 0.0829        |
| Elav <sup>C155</sup> -Gal4 >2N4R                        | 0.5375 ± 0.0875 | 3.7857  | 0.0755        |
|                                                         |                 |         |               |
| Elav <sup>C155</sup> -Gal4 >2N3R                        | 0.4788 ± 0.0966 |         |               |
| Elav <sup>C155</sup> -Gal4 >0N4R                        | 0.9860 ± 0.2017 | 6.9876  | <b>0.0214</b> |
| Elav <sup>C155</sup> -Gal4 >1N4R                        | 1.2739 ± 0.0930 | 17.171  | <b>0.0014</b> |
| Elav <sup>C155</sup> -Gal4 >2N4R                        | 0.5375 ± 0.0875 | 0.0938  | 0.7647        |
|                                                         |                 |         |               |
| Elav <sup>C155</sup> -Gal4 >0N4R                        | 0.9860 ± 0.2017 |         |               |
| Elav <sup>C155</sup> -Gal4 >1N4R                        | 1.2739 ± 0.0930 | 2.2512  | 0.1593        |
| Elav <sup>C155</sup> -Gal4 >2N4R                        | 0.5375 ± 0.0875 | 5.4624  | <b>0.0376</b> |
|                                                         |                 |         |               |
| Elav <sup>C155</sup> -Gal4 >1N4R                        | 1.2739 ± 0.0930 |         |               |
| Elav <sup>C155</sup> -Gal4 >2N4R                        | 0.5375 ± 0.0875 | 14.727  | <b>0.0024</b> |
|                                                         |                 |         |               |
| Genotype                                                | Mean ± SEM      | F-Ratio | p             |
| <b>Figure 1B</b> ANOVA $F_{(5,23)}=0.9896$ , $p=0.4513$ |                 |         |               |
| Elav <sup>C155</sup> -Gal4 >0N3R                        | 0.5772 ± 0.0834 |         |               |
| Elav <sup>C155</sup> -Gal4 >1N3R                        | 0.5461 ± 0.0794 | 0.0403  | 0.8431        |
| Elav <sup>C155</sup> -Gal4 >2N3R                        | 0.5433 ± 0.1246 | 0.0479  | 0.8291        |
| Elav <sup>C155</sup> -Gal4 >0N4R                        | 0.6229 ± 0.1751 | 0.0874  | 0.7709        |
| Elav <sup>C155</sup> -Gal4 >1N4R                        | 0.6378 ± 0.0771 | 0.1532  | 0.7001        |
| Elav <sup>C155</sup> -Gal4 >2N4R                        | 0.3364 ± 0.0802 | 2.4220  | 0.1370        |
|                                                         |                 |         |               |
| Elav <sup>C155</sup> -Gal4 >1N3R                        | 0.5461 ± 0.0794 |         |               |
| Elav <sup>C155</sup> -Gal4 >2N3R                        | 0.5433 ± 0.1246 | 0.0003  | 0.9856        |
| Elav <sup>C155</sup> -Gal4 >0N4R                        | 0.6229 ± 0.1751 | 0.2464  | 0.6256        |

|                                  |                 |        |        |
|----------------------------------|-----------------|--------|--------|
| Elav <sup>C155</sup> -Gal4 >1N4R | 0.6378 ± 0.0771 | 0.3506 | 0.5611 |
| Elav <sup>C155</sup> -Gal4 >2N4R | 0.3364 ± 0.0802 | 1.8375 | 0.1920 |
|                                  |                 |        |        |
| Elav <sup>C155</sup> -Gal4 >2N3R | 0.5433 ± 0.1246 |        |        |
| Elav <sup>C155</sup> -Gal4 >0N4R | 0.6229 ± 0.1751 | 0.2648 | 0.6131 |
| Elav <sup>C155</sup> -Gal4 >1N4R | 0.6378 ± 0.0771 | 0.3725 | 0.5492 |
| Elav <sup>C155</sup> -Gal4 >2N4R | 0.3364 ± 0.0802 | 1.7884 | 0.1978 |
|                                  |                 |        |        |
| Elav <sup>C155</sup> -Gal4 >0N4R | 0.6229 ± 0.1751 |        |        |
| Elav <sup>C155</sup> -Gal4 >1N4R | 0.6378 ± 0.0771 | 0.0092 | 0.9247 |
| Elav <sup>C155</sup> -Gal4 >2N4R | 0.3364 ± 0.0802 | 3.4295 | 0.0805 |
|                                  |                 |        |        |
| Elav <sup>C155</sup> -Gal4 >1N4R | 0.6378 ± 0.0771 |        |        |
| Elav <sup>C155</sup> -Gal4 >2N4R | 0.3364 ± 0.0802 | 3.7934 | 0.0672 |
|                                  |                 |        |        |

### Supplemental Table S2.

**Figure 2A.** The means and SEMs of the quantification of the area of the mushroom body calyces of the indicated genotypes are shown. Following the indicated significant ANOVA the means were compared using Dunnett's tests with the means of the driver heterozygotes

**Figure 2B.** The means and SEMs for the learning performance of the indicated genotypes are shown. ANOVAs and subsequent planned multiple comparisons of the indicated genotypes are shown. Significant differences are highlighted in bold.

| Statistical details from Figure 2                                                   |                 |             |        |
|-------------------------------------------------------------------------------------|-----------------|-------------|--------|
| Genotype                                                                            | Mean ± SEM      | Dunnetts' p |        |
| Figure 2A ANOVA F <sub>(6,63)</sub> =3.3319, p=0.0070                               |                 |             |        |
| Elav <sup>C155</sup> -Gal4> w <sup>1118</sup>                                       | 0.1737 ± 0.0073 | 1           |        |
| Elav <sup>C155</sup> -Gal4 >0N3R                                                    | 0.1520 ± 0.0053 | 0.0311      |        |
| Elav <sup>C155</sup> -Gal4 >1N3R                                                    | 0.1439 ± 0.0057 | 0.0096      |        |
| Elav <sup>C155</sup> -Gal4 >2N3R                                                    | 0.1459 ± 0.0099 | 0.0363      |        |
| Elav <sup>C155</sup> -Gal4 >0N4R                                                    | 0.1431 ± 0.0049 | 0.0028      |        |
| Elav <sup>C155</sup> -Gal4 >1N4R                                                    | 0.1631 ± 0.0039 | 0.2349      |        |
| Elav <sup>C155</sup> -Gal4 >2N4R                                                    | 0.1620 ± 0.0049 | 0.2135      |        |
|                                                                                     |                 |             |        |
| Genotype                                                                            | Mean ± SEM      | F-Ratio     | p      |
| Figure 2B- 3 pairings for 3R isoforms ANOVA F <sub>(6,93)</sub> = 2.2081, p= 0.0497 |                 |             |        |
| w <sup>1118</sup> >0N3R                                                             | 60.100 ± 2.411  |             |        |
| Elav <sup>C155</sup> -Gal4> w <sup>1118</sup>                                       | 61.228 ± 2.108  | 0.0855      | 0.7707 |
| Elav <sup>C155</sup> -Gal4 >0N3R                                                    | 50.348 ± 3.175  | 6.1597      | 0.0150 |
|                                                                                     |                 |             |        |
| Elav <sup>C155</sup> -Gal4> w <sup>1118</sup>                                       | 61.228 ± 2.108  |             |        |
| Elav <sup>C155</sup> -Gal4 >0N3R                                                    | 50.348 ± 3.175  | 7.9512      | 0.0059 |

|                                                                                                            |                    |        |                 |
|------------------------------------------------------------------------------------------------------------|--------------------|--------|-----------------|
| $w^{1118}>1N3R$                                                                                            | $59.257 \pm 2.495$ |        |                 |
| $Elav^{C155}\text{-Gal4}>w^{1118}$                                                                         | $61.228 \pm 2.108$ | 0.2609 | 0.6108          |
| $Elav^{C155}\text{-Gal4}>1N3R$                                                                             | $56.463 \pm 2.230$ | 0.5244 | 0.4709          |
| $Elav^{C155}\text{-Gal4}>w^{1118}$                                                                         | $61.228 \pm 2.108$ |        |                 |
| $Elav^{C155}\text{-Gal4}>1N3R$                                                                             | $56.463 \pm 2.230$ | 1.5837 | 0.2116          |
| $w^{1118}>2N3R$                                                                                            | $53.512 \pm 2.819$ |        |                 |
| $Elav^{C155}\text{-Gal4}>w^{1118}$                                                                         | $61.228 \pm 2.108$ | 3.9987 | 0.0486          |
| $Elav^{C155}\text{-Gal4}>2N3R$                                                                             | $60.442 \pm 3.575$ | 3.2254 | 0.0760          |
| $Elav^{C155}\text{-Gal4}>w^{1118}$                                                                         | $61.228 \pm 2.108$ |        |                 |
| $Elav^{C155}\text{-Gal4}>2N3R$                                                                             | $60.442 \pm 3.575$ | 0.0431 | 0.8360          |
| $Elav^{C155}\text{-Gal4}>0N3R$                                                                             | $50.348 \pm 3.175$ |        |                 |
| $Elav^{C155}\text{-Gal4}>1N3R$                                                                             | $56.463 \pm 2.230$ | 2.5118 | 0.1166          |
| $Elav^{C155}\text{-Gal4}>2N3R$                                                                             | $60.442 \pm 3.575$ | 6.8438 | <b>0.0105</b>   |
| $Elav^{C155}\text{-Gal4}>1N3R$                                                                             | $56.463 \pm 2.230$ |        |                 |
| $Elav^{C155}\text{-Gal4}>2N3R$                                                                             | $60.442 \pm 3.575$ | 1.1043 | 0.2962          |
| <b>Figure 2B- 3 pairings for 4R isoforms ANOVA <math>F_{(6,84)}=21.033</math>, <math>p=1.62e-14</math></b> |                    |        |                 |
| $w^{1118}>0N4R$                                                                                            | $73.072 \pm 1.445$ |        |                 |
| $Elav^{C155}\text{-Gal4}>w^{1118}$                                                                         | $63.466 \pm 2.583$ | 7.3483 | 0.0082          |
| $Elav^{C155}\text{-Gal4}>0N4R$                                                                             | $46.521 \pm 2.820$ | 51.628 | <b>3.49e-10</b> |
| $Elav^{C155}\text{-Gal4}>w^{1118}$                                                                         | $63.466 \pm 2.583$ |        |                 |
| $Elav^{C155}\text{-Gal4}>0N4R$                                                                             | $46.521 \pm 2.820$ | 21.830 | <b>1.22e-5</b>  |
| $w^{1118}>1N4R$                                                                                            | $59.458 \pm 3.095$ |        |                 |
| $Elav^{C155}\text{-Gal4}>w^{1118}$                                                                         | $63.466 \pm 2.583$ | 1.2790 | 0.2615          |
| $Elav^{C155}\text{-Gal4}>1N4R$                                                                             | $37.582 \pm 3.384$ | 35.048 | <b>8.16e-8</b>  |
| $Elav^{C155}\text{-Gal4}>w^{1118}$                                                                         | $63.466 \pm 2.583$ |        |                 |
| $Elav^{C155}\text{-Gal4}>1N4R$                                                                             | $37.582 \pm 3.384$ | 50.941 | <b>4.31e-10</b> |
| $w^{1118}>2N4R$                                                                                            | $57.781 \pm 2.147$ |        |                 |
| $Elav^{C155}\text{-Gal4}>w^{1118}$                                                                         | $63.466 \pm 2.583$ | 2.6806 | 0.1056          |
| $Elav^{C155}\text{-Gal4}>2N4R$                                                                             | $48.241 \pm 2.085$ | 7.5490 | <b>0.0074</b>   |
| $Elav^{C155}\text{-Gal4}>w^{1118}$                                                                         | $63.466 \pm 2.583$ |        |                 |
| $Elav^{C155}\text{-Gal4}>2N4R$                                                                             | $48.241 \pm 2.085$ | 19.226 | <b>3.58e-5</b>  |
| $Elav^{C155}\text{-Gal4}>0N4R$                                                                             | $46.521 \pm 2.820$ |        |                 |
| $Elav^{C155}\text{-Gal4}>1N4R$                                                                             | $37.582 \pm 3.384$ | 5.6088 | <b>0.0203</b>   |
| $Elav^{C155}\text{-Gal4}>2N4R$                                                                             | $48.241 \pm 2.085$ | 0.2248 | 0.6367          |

|                                                                                          |                |        |                 |
|------------------------------------------------------------------------------------------|----------------|--------|-----------------|
| Elav <sup>C155</sup> -Gal4 >1N4R                                                         | 37.582 ± 3.384 |        |                 |
| Elav <sup>C155</sup> -Gal4 > 2N4R                                                        | 48.241 ± 2.085 | 8.6386 | <b>0.0043</b>   |
| <b>Figure 2B- 6 pairings for 3R isoforms ANOVA F<sub>(6,81)</sub>=0.3956, p=0.8796</b>   |                |        |                 |
| w <sup>1118</sup> >ON3R                                                                  | 80.295 ± 2.842 |        |                 |
| Elav <sup>C155</sup> -Gal4 > w <sup>1118</sup>                                           | 77.078 ± 2.026 | 0.9899 | 0.3229          |
| Elav <sup>C155</sup> -Gal4 >ON3R                                                         | 79.239 ± 2.740 | 0.1027 | 0.7495          |
|                                                                                          |                |        |                 |
| Elav <sup>C155</sup> -Gal4 > w <sup>1118</sup>                                           | 77.078 ± 2.026 |        |                 |
| Elav <sup>C155</sup> -Gal4 >ON3R                                                         | 79.239 ± 2.740 | 0.4678 | 0.4961          |
|                                                                                          |                |        |                 |
| w <sup>1118</sup> >1N3R                                                                  | 81.389 ± 2.029 |        |                 |
| Elav <sup>C155</sup> -Gal4 > w <sup>1118</sup>                                           | 77.078 ± 2.026 | 1.7783 | 0.1864          |
| Elav <sup>C155</sup> -Gal4 >1N3R                                                         | 79.841 ± 2.656 | 0.2117 | 0.6467          |
|                                                                                          |                |        |                 |
| Elav <sup>C155</sup> -Gal4 > w <sup>1118</sup>                                           | 77.078 ± 2.026 |        |                 |
| Elav <sup>C155</sup> -Gal4 >1N3R                                                         | 79.841 ± 2.656 | 0.7304 | 0.3955          |
|                                                                                          |                |        |                 |
| w <sup>1118</sup> >2N3R                                                                  | 79.882 ± 2.334 |        |                 |
| Elav <sup>C155</sup> -Gal4 > w <sup>1118</sup>                                           | 77.078 ± 2.026 | 0.7877 | 0.3776          |
| Elav <sup>C155</sup> -Gal4 >2N3R                                                         | 81.000 ± 1.240 | 0.1205 | 0.7294          |
|                                                                                          |                |        |                 |
| Elav <sup>C155</sup> -Gal4 > w <sup>1118</sup>                                           | 77.078 ± 2.026 |        |                 |
| Elav <sup>C155</sup> -Gal4 >2N3R                                                         | 81.000 ± 1.240 | 1.5414 | 0.2183          |
|                                                                                          |                |        |                 |
| Elav <sup>C155</sup> -Gal4 > ON3R                                                        | 79.239 ± 2.740 |        |                 |
| Elav <sup>C155</sup> -Gal4 >1N3R                                                         | 79.841 ± 2.656 | 0.0334 | 0.8554          |
| Elav <sup>C155</sup> -Gal4 > 2N3R                                                        | 81.000 ± 1.240 | 0.2989 | 0.5862          |
|                                                                                          |                |        |                 |
| Elav <sup>C155</sup> -Gal4 >1N3R                                                         | 79.841 ± 2.656 |        |                 |
| Elav <sup>C155</sup> -Gal4 > 2N3R                                                        | 81.000 ± 1.240 | 0.1238 | 0.7259          |
|                                                                                          |                |        |                 |
| <b>Figure 2B- 6 pairings for 4R isoforms ANOVA F<sub>(6,93)</sub>=61.567, p=3.26e-29</b> |                |        |                 |
| w <sup>1118</sup> >ON4R                                                                  | 79.571 ± 2.269 |        |                 |
| Elav <sup>C155</sup> -Gal4 > w <sup>1118</sup>                                           | 73.833 ± 3.074 | 2.7719 | 0.0995          |
| Elav <sup>C155</sup> -Gal4 >ON4R                                                         | 38.217 ± 3.145 | 138.65 | <b>1.07e-19</b> |
|                                                                                          |                |        |                 |
| Elav <sup>C155</sup> -Gal4 > w <sup>1118</sup>                                           | 73.833 ± 3.074 |        |                 |
| Elav <sup>C155</sup> -Gal4 >ON4R                                                         | 38.217 ± 3.145 | 102.84 | <b>2.08e-16</b> |
|                                                                                          |                |        |                 |
| w <sup>1118</sup> >1N4R                                                                  | 72.427 ± 2.147 |        |                 |
| Elav <sup>C155</sup> -Gal4 > w <sup>1118</sup>                                           | 73.833 ± 3.074 | 0.1537 | 0.6960          |
| Elav <sup>C155</sup> -Gal4 >1N4R                                                         | 35.622 ± 1.630 | 105.27 | <b>1.19e-16</b> |
|                                                                                          |                |        |                 |
| Elav <sup>C155</sup> -Gal4 > w <sup>1118</sup>                                           | 73.833 ± 3.074 |        |                 |
| Elav <sup>C155</sup> -Gal4 >1N4R                                                         | 35.622 ± 1.630 | 122.93 | <b>2.53e-18</b> |
|                                                                                          |                |        |                 |
| w <sup>1118</sup> >2N4R                                                                  | 71.816 ± 1.570 |        |                 |

|                                                |                |        |                 |
|------------------------------------------------|----------------|--------|-----------------|
| Elav <sup>C155</sup> -Gal4 > w <sup>1118</sup> | 73.833 ± 3.074 | 0.3426 | 0.5598          |
| Elav <sup>C155</sup> -Gal4 > 2N4R              | 41.500 ± 3.093 | 74.508 | <b>2.55e-13</b> |
| Elav <sup>C155</sup> -Gal4 > w <sup>1118</sup> | 73.833 ± 3.074 |        |                 |
| Elav <sup>C155</sup> -Gal4 > 2N4R              | 41.500 ± 3.093 | 84.754 | <b>1.70e-14</b> |
| Elav <sup>C155</sup> -Gal4 > 0N4R              | 38.217 ± 3.145 |        |                 |
| Elav <sup>C155</sup> -Gal4 > 1N4R              | 35.622 ± 1.630 | 0.5458 | 0.4620          |
| Elav <sup>C155</sup> -Gal4 > 2N4R              | 41.500 ± 3.093 | 0.8430 | 0.3611          |
| Elav <sup>C155</sup> -Gal4 > 1N4R              | 35.622 ± 1.630 |        |                 |
| Elav <sup>C155</sup> -Gal4 > 2N4R              | 41.500 ± 3.093 | 2.8015 | 0.0978          |

### Supplemental Table S3.

The means and SEMs for PSD-M (A) and PSI-M (B) performance of the indicated genotypes are shown. Following the indicated ANOVA, the means were compared using planned multiple comparisons. Significant differences are highlighted in bold.

| Statistical details from Figure 3 |                                                |                                        |         |        |
|-----------------------------------|------------------------------------------------|----------------------------------------|---------|--------|
|                                   | Genotype                                       | Mean ± SEM                             | F-Ratio | p      |
| Figure 3A                         |                                                | ANOVA $F_{(2,31)}=2.039$ , $p=0.1484$  |         |        |
| PSD-M 0N3R                        | w <sup>1118</sup> >0N3R                        | 48.416 ± 5.244                         |         |        |
|                                   | Elav <sup>C155</sup> -Gal4 > w <sup>1118</sup> | 38.933 ± 2.948                         | 2.8796  | 0.1004 |
|                                   | Elav <sup>C155</sup> -Gal4 > 0N3R              | 38.238 ± 3.454                         | 3.3173  | 0.0789 |
|                                   | Elav <sup>C155</sup> -Gal4 > w <sup>1118</sup> | 38.933 ± 2.948                         |         |        |
|                                   | Elav <sup>C155</sup> -Gal4 > 0N3R              | 38.238 ± 3.454                         | 0.0162  | 0.8994 |
|                                   |                                                |                                        |         |        |
| Figure 3A                         |                                                | ANOVA $F_{(2,31)}=0.9166$ , $p=0.4111$ |         |        |
| PSD-M 1N3R                        | w <sup>1118</sup> >1N3R                        | 32.001 ± 3.085                         |         |        |
|                                   | Elav <sup>C155</sup> -Gal4 > w <sup>1118</sup> | 29.293 ± 3.997                         | 0.2708  | 0.6067 |
|                                   | Elav <sup>C155</sup> -Gal4 > 1N3R              | 35.797 ± 3.309                         | 0.5526  | 0.4632 |
|                                   | Elav <sup>C155</sup> -Gal4 > w <sup>1118</sup> | 29.293 ± 3.997                         |         |        |
|                                   | Elav <sup>C155</sup> -Gal4 > 1N3R              | 35.797 ± 3.309                         | 1.8106  | 0.1889 |
|                                   |                                                |                                        |         |        |
| Figure 3A                         |                                                | ANOVA $F_{(2,31)}=2.6441$ , $p=0.0881$ |         |        |
| PSD-M 2N3R                        | w <sup>1118</sup> >2N3R                        | 43.165 ± 5.819                         |         |        |
|                                   | Elav <sup>C155</sup> -Gal4 > w <sup>1118</sup> | 33.281 ± 3.195                         | 2.6209  | 0.1163 |
|                                   | Elav <sup>C155</sup> -Gal4 > 2N3R              | 46.364 ± 3.300                         | 0.2996  | 0.5883 |
|                                   | Elav <sup>C155</sup> -Gal4 > w <sup>1118</sup> | 33.281 ± 3.195                         |         |        |
|                                   | Elav <sup>C155</sup> -Gal4 > 2N3R              | 46.364 ± 3.300                         | 5.0097  | 0.033  |
|                                   |                                                |                                        |         |        |

| Figure 3A  |                             | ANOVA $F_{(2,31)}=25.692$ , $p=3.78e-7$ |        |                |
|------------|-----------------------------|-----------------------------------------|--------|----------------|
| PSD-M ON4R | $w^{1118}>ON4R$             | $49.098 \pm 3.427$                      |        |                |
|            | $Elav^{C155}-Gal4>w^{1118}$ | $44.864 \pm 2.658$                      | 1.1858 | 0.2851         |
|            | $Elav^{C155}-Gal4>ON4R$     | $23.415 \pm 2.049$                      | 43.636 | <b>3.07e-7</b> |
|            |                             |                                         |        |                |
|            | $Elav^{C155}-Gal4>w^{1118}$ | $44.864 \pm 2.658$                      |        |                |
|            | $Elav^{C155}-Gal4>ON4R$     | $23.415 \pm 2.049$                      | 31.957 | <b>4.14e-6</b> |
| Figure 3A  |                             | ANOVA $F_{(2,23)}=10.429$ , $p=0.0007$  |        |                |
| PSD-M 1N4R | $w^{1118}>1N4R$             | $39.195 \pm 5.235$                      |        |                |
|            | $Elav^{C155}-Gal4>w^{1118}$ | $43.778 \pm 3.199$                      | 0.856  | 0.3654         |
|            | $Elav^{C155}-Gal4>1N4R$     | $23.589 \pm 1.667$                      | 10.466 | <b>0.0040</b>  |
|            |                             |                                         |        |                |
|            | $Elav^{C155}-Gal4>w^{1118}$ | $43.778 \pm 3.199$                      |        |                |
|            | $Elav^{C155}-Gal4>1N4R$     | $23.589 \pm 1.667$                      | 18.840 | <b>0.0003</b>  |
| Figure 3A  |                             | ANOVA $F_{(2,31)}=5.324$ , $p=0.011$    |        |                |
| PSD-M 2N4R | $w^{1118}>2N4R$             | $58.560 \pm 2.084$                      |        |                |
|            | $Elav^{C155}-Gal4>w^{1118}$ | $57.202 \pm 3.983$                      | 0.0610 | 0.8066         |
|            | $Elav^{C155}-Gal4>2N4R$     | $43.277 \pm 4.406$                      | 8.4326 | <b>0.0070</b>  |
|            |                             |                                         |        |                |
|            | $Elav^{C155}-Gal4>w^{1118}$ | $57.202 \pm 3.983$                      |        |                |
|            | $Elav^{C155}-Gal4>2N4R$     | $43.277 \pm 4.406$                      | 7.0004 | <b>0.0130</b>  |
| Figure 3B  |                             | ANOVA $F_{(2,28)}=0.2831$ , $p=0.7557$  |        |                |
| PSI-M ON3R | $w^{1118}>ON3R$             | $33.850 \pm 3.560$                      |        |                |
|            | $Elav^{C155}-Gal4>w^{1118}$ | $32.922 \pm 1.972$                      | 0.0489 | 0.8267         |
|            | $Elav^{C155}-Gal4>ON3R$     | $30.678 \pm 3.326$                      | 0.5416 | 0.4683         |
|            |                             |                                         |        |                |
|            | $Elav^{C155}-Gal4>w^{1118}$ | $32.922 \pm 1.972$                      |        |                |
|            | $Elav^{C155}-Gal4>ON3R$     | $30.678 \pm 3.326$                      | 0.2711 | 0.6070         |
| Figure 3B  |                             | ANOVA $F_{(2,32)}=0.1413$ , $p=0.8688$  |        |                |
| PSI-M 1N3R | $w^{1118}>1N3R$             | $23.380 \pm 3.583$                      |        |                |
|            | $Elav^{C155}-Gal4>w^{1118}$ | $24.400 \pm 2.140$                      | 0.0415 | 0.8400         |
|            | $Elav^{C155}-Gal4>1N3R$     | $25.904 \pm 4.011$                      | 0.2780 | 0.6019         |
|            |                             |                                         |        |                |
|            | $Elav^{C155}-Gal4>w^{1118}$ | $24.400 \pm 2.140$                      |        |                |
|            | $Elav^{C155}-Gal4>1N3R$     | $25.904 \pm 4.011$                      | 0.0937 | 0.7616         |
| Figure 3B  |                             | ANOVA $F_{(2,34)}=0.2812$ , $p=0.7567$  |        |                |
| PSI-M 2N3R | $w^{1118}>2N3R$             | $28.552 \pm 2.957$                      |        |                |
|            | $Elav^{C155}-Gal4>w^{1118}$ | $31.151 \pm 2.779$                      | 0.3062 | 0.5839         |
|            | $Elav^{C155}-Gal4>2N3R$     | $31.972 \pm 4.330$                      | 0.5071 | 0.4816         |
|            |                             |                                         |        |                |
|            | $Elav^{C155}-Gal4>w^{1118}$ | $31.151 \pm 2.779$                      |        |                |
|            | $Elav^{C155}-Gal4>2N3R$     | $31.972 \pm 4.330$                      | 0.0292 | 0.8654         |

| Figure 3B  |                             | ANOVA $F_{(2,39)}=2.9498$ , $p=0.0648$ |        |        |
|------------|-----------------------------|----------------------------------------|--------|--------|
| PSI-M ON4R | $w^{1118}>ON4R$             | $35.173 \pm 2.745$                     |        |        |
|            | $Elav^{C155}-Gal4>w^{1118}$ | $43.757 \pm 2.150$                     | 5.7798 | 0.0213 |
|            | $Elav^{C155}-Gal4>ON4R$     | $40.708 \pm 2.730$                     | 2.3168 | 0.1365 |
|            |                             |                                        |        |        |
|            | $Elav^{C155}-Gal4>w^{1118}$ | $43.757 \pm 2.150$                     |        |        |
|            | $Elav^{C155}-Gal4>ON4R$     | $40.708 \pm 2.730$                     | 0.7294 | 0.3986 |
| Figure 3B  |                             | ANOVA $F_{(2,33)}=0.6895$ , $p=0.5094$ |        |        |
| PSI-M 1N4R | $w^{1118}>1N4R$             | $31.781 \pm 1.846$                     |        |        |
|            | $Elav^{C155}-Gal4>w^{1118}$ | $27.737 \pm 4.595$                     | 0.6890 | 0.4128 |
|            | $Elav^{C155}-Gal4>1N4R$     | $26.394 \pm 2.803$                     | 1.3192 | 0.2595 |
|            |                             |                                        |        |        |
|            | $Elav^{C155}-Gal4>w^{1118}$ | $27.737 \pm 4.595$                     |        |        |
|            | $Elav^{C155}-Gal4>1N4R$     | $26.394 \pm 2.803$                     | 0.0864 | 0.7707 |
| Figure 3B  |                             | ANOVA $F_{(2,38)}=0.6591$ , $p=0.5235$ |        |        |
| PSI-M 2N4R | $w^{1118}>2N4R$             | $30.034 \pm 2.343$                     |        |        |
|            | $Elav^{C155}-Gal4>w^{1118}$ | $33.859 \pm 2.202$                     | 1.0727 | 0.3072 |
|            | $Elav^{C155}-Gal4>2N4R$     | $33.379 \pm 3.135$                     | 0.8559 | 0.3610 |
|            |                             |                                        |        |        |
|            | $Elav^{C155}-Gal4>w^{1118}$ | $33.859 \pm 2.202$                     |        |        |
|            | $Elav^{C155}-Gal4>2N4R$     | $33.379 \pm 3.135$                     | 0.0163 | 0.8991 |

#### Supplemental Table S4.

**Figure 4A.** The means and SEMs for odor and electric footshock avoidance performance of the indicated genotypes are shown. Following the indicated ANOVA, the means were compared using planned multiple comparisons.

**Figure 4B.** ANOVAs followed by planned multiple comparisons using the LSM approach of the indicated genotypes in each compartment of the vial are shown. Significant differences are highlighted in bold.

| Statistical details from Figure 4 |                                        |                    |         |        |
|-----------------------------------|----------------------------------------|--------------------|---------|--------|
|                                   | Genotype                               | Mean $\pm$ SEM     | F-Ratio | p      |
| Figure 4A-Avoidance BNZ           |                                        |                    |         |        |
|                                   | ANOVA $F_{(2,27)}=3.8713$ , $p=0.0343$ |                    |         |        |
| ON3R                              | $w^{1118}>ON3R$                        | $67.668 \pm 2.805$ |         |        |
|                                   | $Elav^{C155}-Gal4>w^{1118}$            | $56.070 \pm 3.383$ | 7.1742  | 0.0129 |
|                                   | $Elav^{C155}-Gal4>ON3R$                | $60.329 \pm 2.595$ | 3.6543  | 0.0674 |
|                                   |                                        |                    |         |        |
|                                   | $Elav^{C155}-Gal4>w^{1118}$            | $56.070 \pm 3.383$ |         |        |
|                                   | $Elav^{C155}-Gal4>ON3R$                | $60.329 \pm 2.595$ | 1.0051  | 0.3257 |



| ANOVA $F_{(2,31)}=3.2074$ , $p=0.0552$ |                                    |                    |        |               |
|----------------------------------------|------------------------------------|--------------------|--------|---------------|
| 1N3R                                   | $w^{1118}>1N3R$                    | $72.462 \pm 3.519$ |        |               |
|                                        | $Elav^{C155}\text{-Gal4}>w^{1118}$ | $64.410 \pm 1.618$ | 4.3100 | 0.0468        |
|                                        | $Elav^{C155}\text{-Gal4}>1N3R$     | $63.834 \pm 2.501$ | 5.1954 | <b>0.0302</b> |
|                                        |                                    |                    |        |               |
|                                        | $Elav^{C155}\text{-Gal4}>w^{1118}$ | $64.410 \pm 1.618$ |        |               |
|                                        | $Elav^{C155}\text{-Gal4}>1N3R$     | $63.834 \pm 2.501$ | 0.0220 | 0.8831        |
| ANOVA $F_{(2,31)}=1.0711$ , $p=0.3558$ |                                    |                    |        |               |
| 2N3R                                   | $w^{1118}>2N3R$                    | $69.918 \pm 2.771$ |        |               |
|                                        | $Elav^{C155}\text{-Gal4}>w^{1118}$ | $69.989 \pm 3.852$ | 0.0002 | 0.9886        |
|                                        | $Elav^{C155}\text{-Gal4}>2N3R$     | $63.981 \pm 3.629$ | 1.7520 | 0.1960        |
|                                        |                                    |                    |        |               |
|                                        | $Elav^{C155}\text{-Gal4}>w^{1118}$ | $69.989 \pm 3.852$ |        |               |
|                                        | $Elav^{C155}\text{-Gal4}>2N3R$     | $63.981 \pm 3.629$ | 1.3947 | 0.2472        |
| ANOVA $F_{(2,22)}=2.9509$ , $p=0.0753$ |                                    |                    |        |               |
| 0N4R                                   | $w^{1118}>0N4R$                    | $80.557 \pm 2.977$ |        |               |
|                                        | $Elav^{C155}\text{-Gal4}>w^{1118}$ | $71.875 \pm 4.043$ | 4.1227 | 0.0558        |
|                                        | $Elav^{C155}\text{-Gal4}>0N4R$     | $72.347 \pm 1.832$ | 4.3376 | 0.0503        |
|                                        |                                    |                    |        |               |
|                                        | $Elav^{C155}\text{-Gal4}>w^{1118}$ | $71.875 \pm 4.043$ |        |               |
|                                        | $Elav^{C155}\text{-Gal4}>0N4R$     | $72.347 \pm 1.832$ | 0.0116 | 0.9154        |
| ANOVA $F_{(2,21)}=0.6821$ , $p=0.5175$ |                                    |                    |        |               |
| 1N4R                                   | $w^{1118}>1N4R$                    | $73.833 \pm 5.416$ |        |               |
|                                        | $Elav^{C155}\text{-Gal4}>w^{1118}$ | $69.610 \pm 4.673$ | 0.4936 | 0.4908        |
|                                        | $Elav^{C155}\text{-Gal4}>1N4R$     | $66.817 \pm 2.119$ | 1.3623 | 0.2576        |
|                                        |                                    |                    |        |               |
|                                        | $Elav^{C155}\text{-Gal4}>w^{1118}$ | $69.610 \pm 4.673$ |        |               |
|                                        | $Elav^{C155}\text{-Gal4}>1N4R$     | $66.817 \pm 2.119$ | 0.2518 | 0.6215        |
| ANOVA $F_{(2,31)}=2.2191$ , $p=0.1268$ |                                    |                    |        |               |
| 2N4R                                   | $w^{1118}>2N4R$                    | $70.103 \pm 2.433$ |        |               |
|                                        | $Elav^{C155}\text{-Gal4}>w^{1118}$ | $62.208 \pm 3.267$ | 3.6279 | 0.0668        |
|                                        | $Elav^{C155}\text{-Gal4}>2N4R$     | $69.838 \pm 3.293$ | 0.0041 | 0.9494        |
|                                        |                                    |                    |        |               |
|                                        | $Elav^{C155}\text{-Gal4}>w^{1118}$ | $62.208 \pm 3.267$ |        |               |
|                                        | $Elav^{C155}\text{-Gal4}>2N4R$     | $69.838 \pm 3.293$ | 3.1060 | 0.0885        |
| Figure 4A-Avoidance OCT                |                                    |                    |        |               |
| ANOVA $F_{(2,28)}=1.0050$ , $p=0.3798$ |                                    |                    |        |               |
| 0N3R                                   | $w^{1118}>0N3R$                    | $64.160 \pm 2.106$ |        |               |
|                                        | $Elav^{C155}\text{-Gal4}>w^{1118}$ | $60.137 \pm 2.463$ | 1.6054 | 0.2164        |
|                                        | $Elav^{C155}\text{-Gal4}>0N3R$     | $60.997 \pm 1.854$ | 1.2760 | 0.2689        |
|                                        |                                    |                    |        |               |
|                                        | $Elav^{C155}\text{-Gal4}>w^{1118}$ | $60.137 \pm 2.463$ |        |               |
|                                        | $Elav^{C155}\text{-Gal4}>0N3R$     | $60.997 \pm 1.854$ | 0.0733 | 0.7887        |

| ANOVA $F_{(2,31)}=4.6176$ , $p=0.0182$     |                             |                    |        |                 |
|--------------------------------------------|-----------------------------|--------------------|--------|-----------------|
| 1N3R                                       | $w^{1118}>1N3R$             | $69.539 \pm 2.505$ |        |                 |
|                                            | $Elav^{C155-Gal4}>w^{1118}$ | $60.338 \pm 2.763$ | 6.1407 | 0.0193          |
|                                            | $Elav^{C155-Gal4}>1N3R$     | $59.594 \pm 2.553$ | 7.5331 | <b>0.0103</b>   |
|                                            |                             |                    |        |                 |
|                                            | $Elav^{C155-Gal4}>w^{1118}$ | $60.338 \pm 2.763$ |        |                 |
|                                            | $Elav^{C155-Gal4}>1N3R$     | $59.594 \pm 2.553$ | 0.0402 | 0.8425          |
| ANOVA $F_{(2,31)}=1.7471$ , $p=0.1921$     |                             |                    |        |                 |
| 2N3R                                       | $w^{1118}>2N3R$             | $61.107 \pm 3.008$ |        |                 |
|                                            | $Elav^{C155-Gal4}>w^{1118}$ | $54.299 \pm 3.781$ | 2.1009 | 0.1579          |
|                                            | $Elav^{C155-Gal4}>2N3R$     | $63.043 \pm 2.610$ | 0.2329 | 0.6330          |
|                                            |                             |                    |        |                 |
|                                            | $Elav^{C155-Gal4}>w^{1118}$ | $54.299 \pm 3.781$ |        |                 |
|                                            | $Elav^{C155-Gal4}>2N3R$     | $63.043 \pm 2.610$ | 3.3671 | 0.0768          |
| ANOVA $F_{(2,21)}=1.3749$ , $p=0.2769$     |                             |                    |        |                 |
| 0N4R                                       | $w^{1118}>0N4R$             | $65.477 \pm 3.356$ |        |                 |
|                                            | $Elav^{C155-Gal4}>w^{1118}$ | $68.808 \pm 4.046$ | 0.4830 | 0.4955          |
|                                            | $Elav^{C155-Gal4}>0N4R$     | $60.983 \pm 2.585$ | 1.0259 | 0.3238          |
|                                            |                             |                    |        |                 |
|                                            | $Elav^{C155-Gal4}>w^{1118}$ | $68.808 \pm 4.046$ |        |                 |
|                                            | $Elav^{C155-Gal4}>0N4R$     | $60.983 \pm 2.585$ | 2.6657 | 0.1190          |
| ANOVA $F_{(2,23)}=2.1611$ , $p=0.1401$     |                             |                    |        |                 |
| 1N4R                                       | $w^{1118}>1N4R$             | $69.832 \pm 2.775$ |        |                 |
|                                            | $Elav^{C155-Gal4}>w^{1118}$ | $64.562 \pm 2.692$ | 1.6844 | 0.2084          |
|                                            | $Elav^{C155-Gal4}>1N4R$     | $61.201 \pm 3.042$ | 4.2837 | 0.0510          |
|                                            |                             |                    |        |                 |
|                                            | $Elav^{C155-Gal4}>w^{1118}$ | $64.562 \pm 2.692$ |        |                 |
|                                            | $Elav^{C155-Gal4}>1N4R$     | $61.201 \pm 3.042$ | 0.7369 | 0.4004          |
| ANOVA $F_{(2,34)}=16.7994$ , $p=1.0282e-5$ |                             |                    |        |                 |
| 2N4R                                       | $w^{1118}>2N4R$             | $74.369 \pm 1.835$ |        |                 |
|                                            | $Elav^{C155-Gal4}>w^{1118}$ | $59.167 \pm 2.333$ | 25.934 | 1.518e-5        |
|                                            | $Elav^{C155-Gal4}>2N4R$     | $62.103 \pm 1.717$ | 23.447 | <b>3.141e-5</b> |
|                                            |                             |                    |        |                 |
|                                            | $Elav^{C155-Gal4}>w^{1118}$ | $59.167 \pm 2.333$ |        |                 |
|                                            | $Elav^{C155-Gal4}>2N4R$     | $62.103 \pm 1.717$ | 1.0519 | 0.3127          |
| Figure 4A-Shock Avoidance                  |                             |                    |        |                 |
| ANOVA $F_{(2,23)}=0.7404$ , $p=0.4890$     |                             |                    |        |                 |
| 0N3R                                       | $w^{1118}>0N3R$             | $86.739 \pm 1.974$ |        |                 |
|                                            | $Elav^{C155-Gal4}>w^{1118}$ | $86.339 \pm 1.923$ | 0.0233 | 0.8802          |
|                                            | $Elav^{C155-Gal4}>0N3R$     | $89.703 \pm 1.848$ | 1.0233 | 0.3232          |
|                                            |                             |                    |        |                 |
|                                            | $Elav^{C155-Gal4}>w^{1118}$ | $86.339 \pm 1.923$ |        |                 |

|                  |                                                  |                 |        |        |
|------------------|--------------------------------------------------|-----------------|--------|--------|
|                  | Elav <sup>C155</sup> -Gal4 >ON3R                 | 89.703 ± 1.848  | 1.3181 | 0.2638 |
|                  | <b>ANOVA F<sub>(2,40)</sub>=2.7349, p=0.0777</b> |                 |        |        |
| <b>1N3R</b>      | w <sup>1118</sup> >1N3R                          | 90.892 ± 1.625  |        |        |
|                  | Elav <sup>C155</sup> -Gal4> w <sup>1118</sup>    | 94.775 ± 0.835  | 5.0948 | 0.0298 |
|                  | Elav <sup>C155</sup> -Gal4 >1N3R                 | 91.861 ± 0.962  | 0.3294 | 0.5694 |
|                  |                                                  |                 |        |        |
|                  | Elav <sup>C155</sup> -Gal4> w <sup>1118</sup>    | 94.775 ± 0.835  |        |        |
|                  | Elav <sup>C155</sup> -Gal4 >1N3R                 | 91.861 ± 0.962  | 2.8696 | 0.0984 |
|                  | <b>ANOVA F<sub>(2,27)</sub>=0.9972, p=0.3831</b> |                 |        |        |
| <b>2N3R</b>      | w <sup>1118</sup> >2N3R                          | 94.092 ± 0.938  |        |        |
|                  | Elav <sup>C155</sup> -Gal4> w <sup>1118</sup>    | 96.304 ± 0.902  | 1.9914 | 0.1705 |
|                  | Elav <sup>C155</sup> -Gal4 >2N3R                 | 95.147 ± 1.283  | 0.5094 | 0.4820 |
|                  |                                                  |                 |        |        |
|                  | Elav <sup>C155</sup> -Gal4> w <sup>1118</sup>    | 96.304 ± 0.902  |        |        |
|                  | Elav <sup>C155</sup> -Gal4 >2N3R                 | 95.147 ± 1.283  | 0.5450 | 0.4672 |
|                  | <b>ANOVA F<sub>(2,22)</sub>=0.2171, p=0.8067</b> |                 |        |        |
| <b>ON4R</b>      | w <sup>1118</sup> >ON4R                          | 87.784 ± 0.770  |        |        |
|                  | Elav <sup>C155</sup> -Gal4> w <sup>1118</sup>    | 86.339 ± 1.923  | 0.2119 | 0.6502 |
|                  | Elav <sup>C155</sup> -Gal4 >ON4R                 | 88.466 ± 4.225  | 0.0381 | 0.8471 |
|                  |                                                  |                 |        |        |
|                  | Elav <sup>C155</sup> -Gal4> w <sup>1118</sup>    | 86.339 ± 1.923  |        |        |
|                  | Elav <sup>C155</sup> -Gal4 >ON4R                 | 88.466 ± 4.225  | 0.3901 | 0.5393 |
|                  | <b>ANOVA F<sub>(2,22)</sub>=0.3978, p=0.6770</b> |                 |        |        |
| <b>1N4R</b>      | w <sup>1118</sup> >1N4R                          | 85.754 ± 1.829  |        |        |
|                  | Elav <sup>C155</sup> -Gal4> w <sup>1118</sup>    | 86.339 ± 1.923  | 0.0412 | 0.8412 |
|                  | Elav <sup>C155</sup> -Gal4 >1N4R                 | 83.832 ± 2.426  | 0.3953 | 0.5366 |
|                  |                                                  |                 |        |        |
|                  | Elav <sup>C155</sup> -Gal4> w <sup>1118</sup>    | 86.339 ± 1.923  |        |        |
|                  | Elav <sup>C155</sup> -Gal4 >1N4R                 | 83.832 ± 2.426  | 0.7566 | 0.3947 |
|                  | <b>ANOVA F<sub>(2,23)</sub>=0.1596, p=0.8535</b> |                 |        |        |
| <b>2N4R</b>      | w <sup>1118</sup> >2N4R                          | 87.766 ± 1.785  |        |        |
|                  | Elav <sup>C155</sup> -Gal4> w <sup>1118</sup>    | 86.339 ± 1.923  | 0.2126 | 0.6495 |
|                  | Elav <sup>C155</sup> -Gal4 >2N4R                 | 87.945 ± 3.116  | 0.0029 | 0.9573 |
|                  |                                                  |                 |        |        |
|                  | Elav <sup>C155</sup> -Gal4> w <sup>1118</sup>    | 86.339 ± 1.923  |        |        |
|                  | Elav <sup>C155</sup> -Gal4 >2N4R                 | 87.945 ± 3.116  | 0.2502 | 0.6221 |
| <b>Figure 4B</b> |                                                  |                 |        |        |
| <b>bottom</b>    | <b>ANOVA F<sub>(6,97)</sub>=0.6687, p=0.6751</b> |                 |        |        |
|                  | Elav <sup>C155</sup> -Gal4> w <sup>1118</sup>    | 0.1775 ± 0.0257 |        |        |
|                  | Elav <sup>C155</sup> -Gal4 >ON3R                 | 0.1694 ± 0.0429 | 0.0264 | 0.8713 |
|                  | Elav <sup>C155</sup> -Gal4 >1N3R                 | 0.2006 ± 0.0319 | 0.2414 | 0.6243 |
|                  | Elav <sup>C155</sup> -Gal4 >2N3R                 | 0.2496 ± 0.0408 | 2.4371 | 0.1220 |

|        |                                                |                 |        |        |
|--------|------------------------------------------------|-----------------|--------|--------|
|        | Elav <sup>C155</sup> -Gal4 >ON4R               | 0.2093 ± 0.0325 | 0.4578 | 0.5003 |
|        | Elav <sup>C155</sup> -Gal4 >1N4R               | 0.2334 ± 0.0457 | 1.2859 | 0.2598 |
|        | Elav <sup>C155</sup> -Gal4 >2N4R               | 0.2202 ± 0.0344 | 0.7522 | 0.3880 |
|        |                                                |                 |        |        |
| middle | ANOVA F <sub>(6,97)</sub> = 1.2078, p = 0.3095 |                 |        |        |
|        | Elav <sup>C155</sup> -Gal4 > w <sup>1118</sup> | 0.3009 ± 0.0413 |        |        |
|        | Elav <sup>C155</sup> -Gal4 >ON3R               | 0.2966 ± 0.0410 | 0.0056 | 0.9405 |
|        | Elav <sup>C155</sup> -Gal4 >1N3R               | 0.2925 ± 0.0460 | 0.0234 | 0.8786 |
|        | Elav <sup>C155</sup> -Gal4 >2N3R               | 0.2581 ± 0.0298 | 0.6380 | 0.4265 |
|        | Elav <sup>C155</sup> -Gal4 >ON4R               | 0.3759 ± 0.0331 | 1.8826 | 0.1734 |
|        | Elav <sup>C155</sup> -Gal4 >1N4R               | 0.2715 ± 0.0529 | 0.2646 | 0.6082 |
|        | Elav <sup>C155</sup> -Gal4 >2N4R               | 0.3731 ± 0.0432 | 1.5895 | 0.2106 |
|        |                                                |                 |        |        |
| upper  | ANOVA F <sub>(6,97)</sub> = 1.1171, p = 0.3586 |                 |        |        |
|        | Elav <sup>C155</sup> -Gal4 > w <sup>1118</sup> | 0.5216 ± 0.0383 |        |        |
|        | Elav <sup>C155</sup> -Gal4 >ON3R               | 0.5339 ± 0.0399 | 0.0363 | 0.8494 |
|        | Elav <sup>C155</sup> -Gal4 >1N3R               | 0.5068 ± 0.0536 | 0.0574 | 0.8111 |
|        | Elav <sup>C155</sup> -Gal4 >2N3R               | 0.4923 ± 0.0453 | 0.2349 | 0.6291 |
|        | Elav <sup>C155</sup> -Gal4 >ON4R               | 0.4147 ± 0.0331 | 3.0037 | 0.0865 |
|        | Elav <sup>C155</sup> -Gal4 >1N4R               | 0.4951 ± 0.0691 | 0.1684 | 0.6825 |
|        | Elav <sup>C155</sup> -Gal4 >2N4R               | 0.4067 ± 0.0472 | 3.1687 | 0.0784 |

### Supplemental Table S5.

The means and SEMs of habituation to footshock following exposure to 15-stimuli **(A)** or 2-stimuli **(B)** of the indicated genotypes are shown. ANOVA, followed by planned multiple comparisons using the least squares means (LSM) approach, are shown. Significant differences are highlighted in bold.

| Statistical details from Figure 5 |                                                |               |         |               |
|-----------------------------------|------------------------------------------------|---------------|---------|---------------|
|                                   | Genotype                                       | Mean ± SEM    | F-Ratio | p             |
| Figure 5A-15 stimuli              |                                                |               |         |               |
| ON3R                              | ANOVA F <sub>(2,30)</sub> = 1.2289, p = 0.3079 |               |         |               |
|                                   | w <sup>1118</sup> >ON3R                        | 6.759 ± 0.474 |         |               |
|                                   | Elav <sup>C155</sup> -Gal4 > w <sup>1118</sup> | 8.585 ± 1.718 | 0.8417  | 0.3667        |
|                                   | Elav <sup>C155</sup> -Gal4 >ON3R               | 5.592 ± 1.491 | 0.3950  | 0.5348        |
|                                   | Elav <sup>C155</sup> -Gal4 > w <sup>1118</sup> | 8.585 ± 1.718 |         |               |
|                                   | Elav <sup>C155</sup> -Gal4 >ON3R               | 5.592 ± 1.491 | 2.4530  | 0.1285        |
|                                   |                                                |               |         |               |
| 1N3R                              | ANOVA F <sub>(2,26)</sub> = 4.2644, p = 0.0260 |               |         |               |
|                                   | w <sup>1118</sup> >1N3R                        | 8.268 ± 2.053 |         |               |
|                                   | Elav <sup>C155</sup> -Gal4 > w <sup>1118</sup> | 6.499 ± 0.794 | 0.4655  | 0.5016        |
|                                   | Elav <sup>C155</sup> -Gal4 >1N3R               | 0.583 ± 2.686 | 7.8542  | <b>0.0099</b> |

|                            |                                                   |                |        |               |
|----------------------------|---------------------------------------------------|----------------|--------|---------------|
|                            |                                                   |                |        |               |
|                            | Elav <sup>C155</sup> -Gal4 > w <sup>1118</sup>    | 6.499 ± 0.794  |        |               |
|                            | Elav <sup>C155</sup> -Gal4 > 1N3R                 | 0.583 ± 2.686  | 4.8841 | <b>0.0369</b> |
|                            |                                                   |                |        |               |
| 2N3R                       | <b>ANOVA F<sub>(2,45)</sub>= 2.4007, p=0.1027</b> |                |        |               |
|                            | w <sup>1118</sup> >2N3R                           | 3.239 ± 1.427  |        |               |
|                            | Elav <sup>C155</sup> -Gal4 > w <sup>1118</sup>    | 8.499 ± 1.972  | 4.6242 | 0.0372        |
|                            | Elav <sup>C155</sup> -Gal4 > 2N3R                 | 5.053 ± 1.734  | 0.5326 | 0.4695        |
|                            |                                                   |                |        |               |
|                            | Elav <sup>C155</sup> -Gal4 > w <sup>1118</sup>    | 8.499 ± 1.972  |        |               |
|                            | Elav <sup>C155</sup> -Gal4 > 2N3R                 | 5.053 ± 1.734  | 1.9851 | 0.1660        |
|                            |                                                   |                |        |               |
| 0N4R                       | <b>ANOVA F<sub>(2,29)</sub>=0.9303, p=0.4067</b>  |                |        |               |
|                            | w <sup>1118</sup> >0N4R                           | 5.481 ± 1.295  |        |               |
|                            | Elav <sup>C155</sup> -Gal4 > w <sup>1118</sup>    | 8.585 ± 1.718  | 1.5410 | 0.2251        |
|                            | Elav <sup>C155</sup> -Gal4 > 0N4R                 | 8.151 ± 1.798  | 1.3025 | 0.2638        |
|                            |                                                   |                |        |               |
|                            | Elav <sup>C155</sup> -Gal4 > w <sup>1118</sup>    | 8.585 ± 1.718  |        |               |
|                            | Elav <sup>C155</sup> -Gal4 > 0N4R                 | 8.151 ± 1.798  | 0.0345 | 0.8540        |
|                            |                                                   |                |        |               |
| 1N4R                       | <b>ANOVA F<sub>(2,29)</sub>=1.5501, p=0.2305</b>  |                |        |               |
|                            | w <sup>1118</sup> >1N4R                           | 3.984 ± 1.145  |        |               |
|                            | Elav <sup>C155</sup> -Gal4 > w <sup>1118</sup>    | 6.499 ± 0.794  | 1.1978 | 0.2834        |
|                            | Elav <sup>C155</sup> -Gal4 > 1N4R                 | 7.921 ± 2.183  | 3.0678 | 0.0912        |
|                            |                                                   |                |        |               |
|                            | Elav <sup>C155</sup> -Gal4 > w <sup>1118</sup>    | 6.499 ± 0.794  |        |               |
|                            | Elav <sup>C155</sup> -Gal4 > 1N4R                 | 7.921 ± 2.183  | 0.4236 | 0.5206        |
|                            |                                                   |                |        |               |
| 2N4R                       | <b>ANOVA F<sub>(2,45)</sub>=1.2392, p=0.2997</b>  |                |        |               |
|                            | w <sup>1118</sup> >2N4R                           | 5.061 ± 0.985  |        |               |
|                            | Elav <sup>C155</sup> -Gal4 > w <sup>1118</sup>    | 8.499 ± 1.972  | 1.7249 | 0.1960        |
|                            | Elav <sup>C155</sup> -Gal4 > 2N4R                 | 4.847 ± 2.334  | 0.0065 | 0.9362        |
|                            |                                                   |                |        |               |
|                            | Elav <sup>C155</sup> -Gal4 > w <sup>1118</sup>    | 8.499 ± 1.972  |        |               |
|                            | Elav <sup>C155</sup> -Gal4 > 2N4R                 | 4.847 ± 2.334  | 1.9465 | 0.1701        |
|                            |                                                   |                |        |               |
| <b>Figure 5B-2 stimuli</b> |                                                   |                |        |               |
| 0N3R                       | <b>ANOVA F<sub>(2,29)</sub>=1.2393, p=0.3055</b>  |                |        |               |
|                            | w <sup>1118</sup> >0N3R                           | -0.644 ± 1.503 |        |               |
|                            | Elav <sup>C155</sup> -Gal4 > w <sup>1118</sup>    | -3.631 ± 1.579 | 2.2204 | 0.1478        |
|                            | Elav <sup>C155</sup> -Gal4 > 0N3R                 | -3.138 ± 1.121 | 1.3992 | 0.2472        |
|                            |                                                   |                |        |               |
|                            | Elav <sup>C155</sup> -Gal4 > w <sup>1118</sup>    | -3.631 ± 1.579 |        |               |
|                            | Elav <sup>C155</sup> -Gal4 > 0N3R                 | -3.138 ± 1.121 | 0.0573 | 0.8127        |
|                            |                                                   |                |        |               |
| 1N3R                       | <b>ANOVA F<sub>(2,28)</sub>=0.1282, p=0.8802</b>  |                |        |               |
|                            | w <sup>1118</sup> >1N3R                           | -1.949 ± 1.613 |        |               |
|                            | Elav <sup>C155</sup> -Gal4 > w <sup>1118</sup>    | -3.498 ± 1.695 | 0.2561 | 0.6171        |

|      |                                                |                |        |               |
|------|------------------------------------------------|----------------|--------|---------------|
|      | Elav <sup>C155</sup> -Gal4 >1N3R               | -2.798 ± 2.721 | 0.0739 | 0.7879        |
|      |                                                |                |        |               |
|      | Elav <sup>C155</sup> -Gal4 > w <sup>1118</sup> | -3.498 ± 1.695 |        |               |
|      | Elav <sup>C155</sup> -Gal4 >1N3R               | -2.798 ± 2.721 | 0.0591 | 0.8098        |
|      |                                                |                |        |               |
| 2N3R | ANOVA F <sub>(2,25)</sub> = 13.7352, p=0.0001  |                |        |               |
|      | w <sup>1118</sup> >2N3R                        | -2.212 ± 1.106 |        |               |
|      | Elav <sup>C155</sup> -Gal4 > w <sup>1118</sup> | -2.830 ± 2.226 | 0.0630 | 0.8040        |
|      | Elav <sup>C155</sup> -Gal4 >2N3R               | 7.384 ± 1.489  | 18.853 | <b>0.0002</b> |
|      |                                                |                |        |               |
|      | Elav <sup>C155</sup> -Gal4 > w <sup>1118</sup> | -2.830 ± 2.226 |        |               |
|      | Elav <sup>C155</sup> -Gal4 >2N3R               | 7.384 ± 1.489  | 19.727 | <b>0.0002</b> |
|      |                                                |                |        |               |
| 0N4R | ANOVA F <sub>(2,30)</sub> =9.2731, p=0.0008    |                |        |               |
|      | w <sup>1118</sup> >0N4R                        | -2.013 ± 1.267 |        |               |
|      | Elav <sup>C155</sup> -Gal4 > w <sup>1118</sup> | -3.631 ± 1.579 | 0.3719 | 0.5469        |
|      | Elav <sup>C155</sup> -Gal4 >0N4R               | 5.512 ± 1.792  | 8.5583 | <b>0.0067</b> |
|      |                                                |                |        |               |
|      | Elav <sup>C155</sup> -Gal4 > w <sup>1118</sup> | -3.631 ± 1.579 |        |               |
|      | Elav <sup>C155</sup> -Gal4 >0N4R               | 5.512 ± 1.792  | 16.544 | <b>0.0003</b> |
|      |                                                |                |        |               |
| 1N4R | ANOVA F <sub>(2,33)</sub> =7.8347, p=0.0018    |                |        |               |
|      | w <sup>1118</sup> >1N4R                        | -0.123 ± 0.708 |        |               |
|      | Elav <sup>C155</sup> -Gal4 > w <sup>1118</sup> | -3.498 ± 1.695 | 2.2555 | 0.1433        |
|      | Elav <sup>C155</sup> -Gal4 >1N4R               | 5.491 ± 2.166  | 6.2410 | <b>0.0180</b> |
|      |                                                |                |        |               |
|      | Elav <sup>C155</sup> -Gal4 > w <sup>1118</sup> | -3.498 ± 1.695 |        |               |
|      | Elav <sup>C155</sup> -Gal4 >1N4R               | 5.491 ± 2.166  | 15.333 | <b>0.0005</b> |
|      |                                                |                |        |               |
| 2N4R | ANOVA F <sub>(2,25)</sub> =0.5918, p=0.5615    |                |        |               |
|      | w <sup>1118</sup> >2N4R                        | -0.565 ± 1.165 |        |               |
|      | Elav <sup>C155</sup> -Gal4 > w <sup>1118</sup> | -2.830 ± 2.226 | 0.8661 | 0.3617        |
|      | Elav <sup>C155</sup> -Gal4 >2N4R               | -0.351 ± 1.789 | 0.0089 | 0.9254        |
|      |                                                |                |        |               |
|      | Elav <sup>C155</sup> -Gal4 > w <sup>1118</sup> | -2.830 ± 2.226 |        |               |
|      | Elav <sup>C155</sup> -Gal4 >2N4R               | -0.351 ± 1.789 | 0.9927 | 0.3295        |
|      |                                                |                |        |               |

**Supplemental Table S6.**

The means and SEMs of the four 6-hour intervals per day (early day: 0600-1130, late day: 1200-1730, early night: 1800-2330 and late night 2400-0530 hours) of the indicated genotypes are shown. Following the indicated ANOVA, the means we compared using planned multiple comparisons. Significant differences are highlighted in bold.

| Statistical details from Figure 6                   |           |                                               |                 |         |                |
|-----------------------------------------------------|-----------|-----------------------------------------------|-----------------|---------|----------------|
|                                                     | Genotype  |                                               | Mean ± SEM      | F-Ratio | p              |
| ANOVA F <sub>(11,643)</sub> =43.3223, p=6.1587e-70  |           |                                               |                 |         |                |
| ON3R                                                | 0600-1130 | w <sup>1118</sup> >ON3R                       | 138.08 ± 10.137 |         |                |
|                                                     |           | Elav <sup>C155</sup> -Gal4> w <sup>1118</sup> | 144.96 ± 10.680 | 0.3217  | 0.5708         |
|                                                     |           | Elav <sup>C155</sup> -Gal4 >ON3R              | 199.47 ± 11.834 | 27.188  | <b>2.50e-7</b> |
|                                                     |           |                                               |                 |         |                |
|                                                     |           | Elav <sup>C155</sup> -Gal4> w <sup>1118</sup> | 144.96 ± 10.680 |         |                |
|                                                     |           | Elav <sup>C155</sup> -Gal4 >ON3R              | 199.47 ± 11.834 | 21.891  | <b>3.53e-6</b> |
|                                                     |           |                                               |                 |         |                |
|                                                     | 1200-1730 | w <sup>1118</sup> >ON3R                       | 48.79 ± 5.132   |         |                |
|                                                     |           | Elav <sup>C155</sup> -Gal4> w <sup>1118</sup> | 47.69 ± 7.936   | 0.0082  | 0.9279         |
|                                                     |           | Elav <sup>C155</sup> -Gal4 >ON3R              | 61.78 ± 7.825   | 1.2171  | 0.2703         |
|                                                     |           |                                               |                 |         |                |
|                                                     |           | Elav <sup>C155</sup> -Gal4> w <sup>1118</sup> | 47.69 ± 7.936   |         |                |
|                                                     |           | Elav <sup>C155</sup> -Gal4 >ON3R              | 61.78 ± 7.825   | 1.4619  | 0.2271         |
|                                                     |           |                                               |                 |         |                |
|                                                     | 1800-2330 | w <sup>1118</sup> >ON3R                       | 95.51 ± 7.700   |         |                |
|                                                     |           | Elav <sup>C155</sup> -Gal4> w <sup>1118</sup> | 101.23 ± 8.358  | 0.2223  | 0.6374         |
|                                                     |           | Elav <sup>C155</sup> -Gal4 >ON3R              | 131.90 ± 9.345  | 9.5509  | <b>0.0021</b>  |
|                                                     |           |                                               |                 |         |                |
|                                                     |           | Elav <sup>C155</sup> -Gal4> w <sup>1118</sup> | 101.23 ± 8.358  |         |                |
|                                                     |           | Elav <sup>C155</sup> -Gal4 >ON3R              | 131.90 ± 9.345  | 6.9281  | <b>0.0087</b>  |
|                                                     |           |                                               |                 |         |                |
|                                                     | 2400-0530 | w <sup>1118</sup> >ON3R                       | 37.94 ± 6.602   |         |                |
|                                                     |           | Elav <sup>C155</sup> -Gal4> w <sup>1118</sup> | 38.80 ± 5.197   | 0.6461  | 0.4218         |
|                                                     |           | Elav <sup>C155</sup> -Gal4 >ON3R              | 31.76 ± 5.092   | 0.2752  | 0.6000         |
|                                                     |           |                                               |                 |         |                |
| Elav <sup>C155</sup> -Gal4> w <sup>1118</sup>       |           | 38.80 ± 5.197                                 |                 |         |                |
| Elav <sup>C155</sup> -Gal4 >ON3R                    |           | 31.76 ± 5.092                                 | 0.3646          | 0.5462  |                |
|                                                     |           |                                               |                 |         |                |
| ANOVA F <sub>(11,1151)</sub> =50.7056, p=8.5036e-91 |           |                                               |                 |         |                |
| 1N3R                                                | 0600-1130 | w <sup>1118</sup> >1N3R                       | 183.05 ± 11.940 |         |                |
|                                                     |           | Elav <sup>C155</sup> -Gal4> w <sup>1118</sup> | 160.65 ± 8.206  | 3.2133  | 0.0733         |
|                                                     |           | Elav <sup>C155</sup> -Gal4 >1N3R              | 176.24 ± 7.693  | 0.2970  | 0.5858         |
|                                                     |           |                                               |                 |         |                |
|                                                     |           | Elav <sup>C155</sup> -Gal4> w <sup>1118</sup> | 160.65 ± 8.206  |         |                |
|                                                     |           | Elav <sup>C155</sup> -Gal4 >1N3R              | 176.24 ± 7.693  | 1.5564  | 0.2124         |
|                                                     |           |                                               |                 |         |                |

|             |                                                                          |                                     |                     |        |                 |
|-------------|--------------------------------------------------------------------------|-------------------------------------|---------------------|--------|-----------------|
| <b>2N3R</b> | 1200-1730                                                                | $w^{1118}>1N3R$                     | $93.85 \pm 10.996$  |        |                 |
|             |                                                                          | $Elav^{C155}\text{-Gal4}> w^{1118}$ | $46.61 \pm 8.111$   | 14.283 | 0.0002          |
|             |                                                                          | $Elav^{C155}\text{-Gal4}>1N3R$      | $78.68 \pm 8.020$   | 1.4733 | 0.2251          |
|             |                                                                          |                                     |                     |        |                 |
|             |                                                                          | $Elav^{C155}\text{-Gal4}> w^{1118}$ | $46.61 \pm 8.111$   |        |                 |
|             |                                                                          | $Elav^{C155}\text{-Gal4}>1N3R$      | $78.68 \pm 8.020$   | 6.5818 | <b>0.0104</b>   |
|             | 1800-2330                                                                | $w^{1118}>1N3R$                     | $156.64 \pm 7.584$  |        |                 |
|             |                                                                          | $Elav^{C155}\text{-Gal4}> w^{1118}$ | $154.62 \pm 6.664$  | 0.0260 | 0.8719          |
|             |                                                                          | $Elav^{C155}\text{-Gal4}>1N3R$      | $238.41 \pm 12.350$ | 42.791 | <b>9.18e-11</b> |
|             |                                                                          |                                     |                     |        |                 |
|             |                                                                          | $Elav^{C155}\text{-Gal4}> w^{1118}$ | $154.62 \pm 6.664$  |        |                 |
|             |                                                                          | $Elav^{C155}\text{-Gal4}>1N3R$      | $238.41 \pm 12.350$ | 44.926 | <b>3.21e-11</b> |
|             | 2400-0530                                                                | $w^{1118}>1N3R$                     | $86.09 \pm 9.252$   |        |                 |
|             |                                                                          | $Elav^{C155}\text{-Gal4}> w^{1118}$ | $41.02 \pm 3.888$   | 13.006 | 0.0003          |
|             |                                                                          | $Elav^{C155}\text{-Gal4}>1N3R$      | $63.57 \pm 7.884$   | 3.2462 | 0.0718          |
|             |                                                                          |                                     |                     |        |                 |
|             |                                                                          | $Elav^{C155}\text{-Gal4}> w^{1118}$ | $41.02 \pm 3.888$   |        |                 |
|             |                                                                          | $Elav^{C155}\text{-Gal4}>1N3R$      | $63.57 \pm 7.884$   | 3.2567 | 0.0714          |
|             | <b>ANOVA <math>F_{(11,979)}=52.4175</math>, <math>p=1.709e-90</math></b> |                                     |                     |        |                 |
|             | 0600-1130                                                                | $w^{1118}>2N3R$                     | $181.17 \pm 10.331$ |        |                 |
|             |                                                                          | $Elav^{C155}\text{-Gal4}> w^{1118}$ | $157.76 \pm 8.782$  | 3.4645 | 0.0630          |
|             |                                                                          | $Elav^{C155}\text{-Gal4}>2N3R$      | $195.15 \pm 8.039$  | 1.2423 | 0.2653          |
|             |                                                                          |                                     |                     |        |                 |
|             |                                                                          | $Elav^{C155}\text{-Gal4}> w^{1118}$ | $157.76 \pm 8.782$  |        |                 |
|             |                                                                          | $Elav^{C155}\text{-Gal4}>2N3R$      | $195.15 \pm 8.039$  | 9.3575 | <b>0.0023</b>   |
|             | 1200-1730                                                                | $w^{1118}>2N3R$                     | $106.60 \pm 7.564$  |        |                 |
|             |                                                                          | $Elav^{C155}\text{-Gal4}> w^{1118}$ | $58.79 \pm 9.570$   | 14.446 | 0.0001          |
|             |                                                                          | $Elav^{C155}\text{-Gal4}>2N3R$      | $106 \pm 9.370$     | 0.0023 | 0.9619          |
|             |                                                                          |                                     |                     |        |                 |
|             |                                                                          | $Elav^{C155}\text{-Gal4}> w^{1118}$ | $58.79 \pm 9.570$   |        |                 |
|             |                                                                          | $Elav^{C155}\text{-Gal4}>2N3R$      | $106 \pm 9.370$     | 14.915 | <b>0.0001</b>   |
|             | 1800-2330                                                                | $w^{1118}>2N3R$                     | $171.57 \pm 8.965$  |        |                 |
|             |                                                                          | $Elav^{C155}\text{-Gal4}> w^{1118}$ | $144.76 \pm 7.901$  | 4.5399 | 0.0334          |
|             |                                                                          | $Elav^{C155}\text{-Gal4}>2N3R$      | $233.46 \pm 12.451$ | 24.347 | <b>9.47e-7</b>  |
|             |                                                                          |                                     |                     |        |                 |
|             |                                                                          | $Elav^{C155}\text{-Gal4}> w^{1118}$ | $144.76 \pm 7.901$  |        |                 |
|             |                                                                          | $Elav^{C155}\text{-Gal4}>2N3R$      | $233.46 \pm 12.451$ | 52.645 | <b>8.18e-13</b> |
|             | 2400-0530                                                                | $w^{1118}>2N3R$                     | $62.67 \pm 9.081$   |        |                 |
|             |                                                                          | $Elav^{C155}\text{-Gal4}> w^{1118}$ | $51.89 \pm 4.792$   | 0.7341 | 0.3918          |
|             |                                                                          | $Elav^{C155}\text{-Gal4}>2N3R$      | $46.21 \pm 6.292$   | 1.7215 | 0.1898          |
|             |                                                                          |                                     |                     |        |                 |
|             |                                                                          | $Elav^{C155}\text{-Gal4}> w^{1118}$ | $51.89 \pm 4.792$   |        |                 |



|                                                     |           |                                               |                 |        |          |  |
|-----------------------------------------------------|-----------|-----------------------------------------------|-----------------|--------|----------|--|
|                                                     |           | Elav <sup>C155</sup> -Gal4 >2N3R              | 46.21 ± 6.292   | 0.2159 | 0.6422   |  |
|                                                     |           |                                               |                 |        |          |  |
| ANOVA F <sub>(11,1139)</sub> =197.3919, p=9.27e-254 |           |                                               |                 |        |          |  |
| 0N4R                                                | 0600-1130 | w <sup>1118</sup> >0N4R                       | 271.16 ± 10.591 |        |          |  |
|                                                     |           | Elav <sup>C155</sup> -Gal4> w <sup>1118</sup> | 260.46 ± 9.009  | 0.9076 | 0.3409   |  |
|                                                     |           | Elav <sup>C155</sup> -Gal4 >0N4R              | 348.52 ± 13.366 | 47.188 | 1.06e-11 |  |
|                                                     |           |                                               |                 |        |          |  |
|                                                     |           | Elav <sup>C155</sup> -Gal4> w <sup>1118</sup> | 260.46 ± 9.009  |        |          |  |
|                                                     |           | Elav <sup>C155</sup> -Gal4 >0N4R              | 348.52 ± 13.366 | 61.793 | 8.86e-15 |  |
|                                                     | 1200-1730 | w <sup>1118</sup> >0N4R                       | 61.96 ± 3.931   |        |          |  |
|                                                     |           | Elav <sup>C155</sup> -Gal4> w <sup>1118</sup> | 46.48 ± 3.728   | 1.9001 | 0.1683   |  |
|                                                     |           | Elav <sup>C155</sup> -Gal4 >0N4R              | 44.47 ± 3.926   | 2.4131 | 0.1206   |  |
|                                                     |           |                                               |                 |        |          |  |
|                                                     |           | Elav <sup>C155</sup> -Gal4> w <sup>1118</sup> | 46.48 ± 3.728   |        |          |  |
|                                                     |           | Elav <sup>C155</sup> -Gal4 >0N4R              | 44.47 ± 3.926   | 0.0322 | 0.8576   |  |
|                                                     | 1800-2330 | w <sup>1118</sup> >0N4R                       | 190.38 ± 6.876  |        |          |  |
|                                                     |           | Elav <sup>C155</sup> -Gal4> w <sup>1118</sup> | 183.22 ± 8.444  | 0.4056 | 0.5243   |  |
|                                                     |           | Elav <sup>C155</sup> -Gal4 >0N4R              | 232.4 ± 11.473  | 13.923 | 0.0002   |  |
|                                                     |           |                                               |                 |        |          |  |
|                                                     |           | Elav <sup>C155</sup> -Gal4> w <sup>1118</sup> | 183.22 ± 8.444  |        |          |  |
|                                                     |           | Elav <sup>C155</sup> -Gal4 >0N4R              | 232.4 ± 11.473  | 19.269 | 1.24e-5  |  |
|                                                     | 2400-0530 | w <sup>1118</sup> >0N4R                       | 46.69 ± 3.3662  |        |          |  |
|                                                     |           | Elav <sup>C155</sup> -Gal4> w <sup>1118</sup> | 39.31 ± 4.387   | 0.4315 | 0.5113   |  |
|                                                     |           | Elav <sup>C155</sup> -Gal4 >0N4R              | 57.1 ± 7.704    | 0.8542 | 0.3556   |  |
|                                                     |           |                                               |                 |        |          |  |
|                                                     |           | Elav <sup>C155</sup> -Gal4> w <sup>1118</sup> | 39.31 ± 4.387   |        |          |  |
|                                                     |           | Elav <sup>C155</sup> -Gal4 >0N4R              | 57.1 ± 7.704    | 2.5211 | 0.1126   |  |
|                                                     |           |                                               |                 |        |          |  |
| ANOVA F <sub>(11,1143)</sub> =152.5621, p=1.47e-214 |           |                                               |                 |        |          |  |
|                                                     |           |                                               |                 |        |          |  |
| 1N4R                                                | 0600-1130 | w <sup>1118</sup> >1N4R                       | 266.79 ± 8.565  |        |          |  |
|                                                     |           | Elav <sup>C155</sup> -Gal4> w <sup>1118</sup> | 260.46 ± 9.009  | 0.2567 | 0.6125   |  |
|                                                     |           | Elav <sup>C155</sup> -Gal4 >1N4R              | 325.53 ± 15.903 | 22.075 | 2.94e-6  |  |
|                                                     |           |                                               |                 |        |          |  |
|                                                     |           | Elav <sup>C155</sup> -Gal4> w <sup>1118</sup> | 260.46 ± 9.009  |        |          |  |
|                                                     |           | Elav <sup>C155</sup> -Gal4 >1N4R              | 325.53 ± 15.903 | 27.381 | 1.99e-7  |  |
|                                                     | 1200-1730 | w <sup>1118</sup> >1N4R                       | 98.06 ± 5.547   |        |          |  |
|                                                     |           | Elav <sup>C155</sup> -Gal4> w <sup>1118</sup> | 46.48 ± 3.728   | 17.024 | 3.96e-5  |  |
|                                                     |           | Elav <sup>C155</sup> -Gal4 >1N4R              | 84.12 ± 6.651   | 1.2423 | 0.2653   |  |
|                                                     |           |                                               |                 |        |          |  |
|                                                     |           | Elav <sup>C155</sup> -Gal4> w <sup>1118</sup> | 46.48 ± 3.728   |        |          |  |
|                                                     |           | Elav <sup>C155</sup> -Gal4 >1N4R              | 84.12 ± 6.651   | 9.1654 | 0.0025   |  |
|                                                     |           |                                               |                 |        |          |  |
|                                                     |           | w <sup>1118</sup> >1N4R                       | 243.01 ± 8.977  |        |          |  |

|      |                                                     |                                                |                                                |                 |                 |
|------|-----------------------------------------------------|------------------------------------------------|------------------------------------------------|-----------------|-----------------|
| 2N4R | 1800-2330                                           | Elav <sup>C155</sup> -Gal4 > w <sup>1118</sup> | 183.22 ± 8.444                                 | 22.873          | 1.96e-6         |
|      |                                                     | Elav <sup>C155</sup> -Gal4 > 1N4R              | 292.96 ± 12.951                                | 15.968          | <b>6.86e-5</b>  |
|      |                                                     |                                                |                                                |                 |                 |
|      |                                                     | Elav <sup>C155</sup> -Gal4 > w <sup>1118</sup> | 183.22 ± 8.444                                 |                 |                 |
|      |                                                     | Elav <sup>C155</sup> -Gal4 > 1N4R              | 292.96 ± 12.951                                | 77.883          | <b>4.07e-18</b> |
|      |                                                     |                                                |                                                |                 |                 |
|      | 2400-0530                                           | w <sup>1118</sup> > 1N4R                       | 61.78 ± 4.593                                  |                 |                 |
|      |                                                     | Elav <sup>C155</sup> -Gal4 > w <sup>1118</sup> | 39.31 ± 4.387                                  | 3.2292          | 0.0726          |
|      |                                                     | Elav <sup>C155</sup> -Gal4 > 1N4R              | 60.72 ± 8.572                                  | 0.0071          | 0.9329          |
|      |                                                     |                                                |                                                |                 |                 |
|      |                                                     | Elav <sup>C155</sup> -Gal4 > w <sup>1118</sup> | 39.31 ± 4.387                                  |                 |                 |
|      |                                                     | Elav <sup>C155</sup> -Gal4 > 1N4R              | 60.72 ± 8.572                                  | 2.9649          | 0.0854          |
|      | ANOVA F <sub>(11,1135)</sub> =180.9182, p=1.17e-239 |                                                |                                                |                 |                 |
|      | 2N4R                                                | 0600-1130                                      | w <sup>1118</sup> > 2N4R                       | 233.05 ± 9.582  |                 |
|      |                                                     |                                                | Elav <sup>C155</sup> -Gal4 > w <sup>1118</sup> | 260.46 ± 9.009  | 7.3152          |
|      |                                                     |                                                | Elav <sup>C155</sup> -Gal4 > 2N4R              | 258.04 ± 10.432 | 6.0508          |
|      |                                                     |                                                |                                                |                 | <b>0.0140</b>   |
|      |                                                     |                                                | Elav <sup>C155</sup> -Gal4 > w <sup>1118</sup> | 260.46 ± 9.009  |                 |
|      |                                                     |                                                | Elav <sup>C155</sup> -Gal4 > 2N4R              | 258.04 ± 10.432 | 0.0575          |
|      |                                                     | 1200-1730                                      | w <sup>1118</sup> > 2N4R                       | 81.74 ± 4.548   |                 |
|      |                                                     |                                                | Elav <sup>C155</sup> -Gal4 > w <sup>1118</sup> | 46.48 ± 3.728   | 12.112          |
|      |                                                     |                                                | Elav <sup>C155</sup> -Gal4 > 2N4R              | 61.58 ± 4.867   | 3.9375          |
|      |                                                     |                                                |                                                |                 | <b>0.0475</b>   |
|      |                                                     |                                                | Elav <sup>C155</sup> -Gal4 > w <sup>1118</sup> | 46.48 ± 3.728   |                 |
|      |                                                     |                                                | Elav <sup>C155</sup> -Gal4 > 2N4R              | 61.58 ± 4.867   | 2.2464          |
|      |                                                     | 1800-2330                                      | w <sup>1118</sup> > 2N4R                       | 197.74 ± 8.693  |                 |
|      |                                                     |                                                | Elav <sup>C155</sup> -Gal4 > w <sup>1118</sup> | 183.22 ± 8.443  | 2.0515          |
|      |                                                     |                                                | Elav <sup>C155</sup> -Gal4 > 2N4R              | 245.73 ± 9.171  | 22.321          |
|      |                                                     |                                                |                                                |                 | <b>2.60e-6</b>  |
|      |                                                     |                                                | Elav <sup>C155</sup> -Gal4 > w <sup>1118</sup> | 183.22 ± 8.443  |                 |
|      |                                                     |                                                | Elav <sup>C155</sup> -Gal4 > 2N4R              | 245.73 ± 9.171  | 38.469          |
|      |                                                     | 2400-0530                                      | w <sup>1118</sup> > 2N4R                       | 49.55 ± 3.351   |                 |
|      |                                                     |                                                | Elav <sup>C155</sup> -Gal4 > w <sup>1118</sup> | 39.31 ± 4.387   | 1.0216          |
|      |                                                     |                                                | Elav <sup>C155</sup> -Gal4 > 2N4R              | 32.15 ± 3.644   | 2.9360          |
|      |                                                     |                                                |                                                |                 | 0.0869          |
|      |                                                     |                                                | Elav <sup>C155</sup> -Gal4 > w <sup>1118</sup> | 39.31 ± 4.387   |                 |
|      |                                                     |                                                | Elav <sup>C155</sup> -Gal4 > 2N4R              | 32.15 ± 3.644   | 0.5055          |

**Supplemental Table S7.**

Mean mortalities after 24, 48, 52, 58 and 75 hours of exposure to 5% H<sub>2</sub>O<sub>2</sub> of the indicated genotypes were compared with that of elavGAL4>w<sup>1118</sup> control animals following the indicated significant ANOVA with planned multiple comparisons as indicated. Significant differences are highlighted in bold.

| <b>Statistical details from Figure 7</b>             |                                               |                   |                |               |
|------------------------------------------------------|-----------------------------------------------|-------------------|----------------|---------------|
|                                                      | <b>Genotype</b>                               | <b>Mean ± SEM</b> | <b>F-Ratio</b> | <b>p</b>      |
| <b>ANOVA F<sub>(6,524)</sub>=10,3976, p=6,76e-11</b> |                                               |                   |                |               |
| <b>24 Hours</b>                                      | Elav <sup>C155</sup> -Gal4> w <sup>1118</sup> | 0.667 ± 0.454     |                |               |
|                                                      | Elav <sup>C155</sup> -Gal4 >0N3R              | 0.667 ± 0.454     | 1.4e-32        | 1             |
|                                                      | Elav <sup>C155</sup> -Gal4 >1N3R              | 0.667 ± 0.454     | 1.4e-32        | 1             |
|                                                      | Elav <sup>C155</sup> -Gal4 >2N3R              | 0.333 ± 0.333     | 0.1310         | 0.7182        |
|                                                      | Elav <sup>C155</sup> -Gal4 >0N4R              | 2.333 ± 0.959     | 3.2754         | 0.0734        |
|                                                      | Elav <sup>C155</sup> -Gal4 >1N4R              | 3.333 ± 1.054     | 8.3850         | <b>0.0047</b> |
|                                                      | Elav <sup>C155</sup> -Gal4 >2N4R              | 0.667 ± 0.454     | 0              | 1             |
|                                                      |                                               |                   |                |               |
|                                                      | Elav <sup>C155</sup> -Gal4 >0N3R              | 0.667 ± 0.454     |                |               |
|                                                      | Elav <sup>C155</sup> -Gal4 >1N3R              | 0.667 ± 0.454     | 0              | 1             |
|                                                      | Elav <sup>C155</sup> -Gal4 >2N3R              | 0.333 ± 0.333     | 0.1310         | 0.7182        |
|                                                      | Elav <sup>C155</sup> -Gal4 >0N4R              | 2.333 ± 0.959     | 3.2754         | 0.0734        |
|                                                      | Elav <sup>C155</sup> -Gal4 >1N4R              | 3.333 ± 1.054     | 8.3850         | <b>0.0047</b> |
|                                                      | Elav <sup>C155</sup> -Gal4 >2N4R              | 0.667 ± 0.454     | 1.4e-32        | 1             |
|                                                      |                                               |                   |                |               |
|                                                      | Elav <sup>C155</sup> -Gal4 >1N3R              | 0.667 ± 0.454     |                |               |
|                                                      | Elav <sup>C155</sup> -Gal4 >2N3R              | 0.333 ± 0.333     | 0.1310         | 0.7182        |
|                                                      | Elav <sup>C155</sup> -Gal4 >0N4R              | 2.333 ± 0.959     | 3.2754         | 0.0734        |
|                                                      | Elav <sup>C155</sup> -Gal4 >1N4R              | 3.333 ± 1.054     | 8.3850         | <b>0.0047</b> |
|                                                      | Elav <sup>C155</sup> -Gal4 >2N4R              | 0.667 ± 0.454     | 1.4e-32        | 1             |
|                                                      |                                               |                   |                |               |
|                                                      | Elav <sup>C155</sup> -Gal4 >2N3R              | 0.333 ± 0.333     |                |               |
|                                                      | Elav <sup>C155</sup> -Gal4 >0N4R              | 2.333 ± 0.959     | 4.7166         | <b>0.0323</b> |
|                                                      | Elav <sup>C155</sup> -Gal4 >1N4R              | 3.333 ± 1.054     | 10.612         | <b>0.0015</b> |
|                                                      | Elav <sup>C155</sup> -Gal4 >2N4R              | 0.667 ± 0.454     | 0.1310         | 0.7182        |
|                                                      |                                               |                   |                |               |
|                                                      | Elav <sup>C155</sup> -Gal4 >0N4R              | 2.333 ± 0.959     |                |               |
|                                                      | Elav <sup>C155</sup> -Gal4 >1N4R              | 3.333 ± 1.054     | 1.1791         | 0.2802        |
|                                                      | Elav <sup>C155</sup> -Gal4 >2N4R              | 0.667 ± 0.454     | 3.2754         | 0.0734        |
|                                                      |                                               |                   |                |               |
|                                                      | Elav <sup>C155</sup> -Gal4 >1N4R              | 3.333 ± 1.054     |                |               |
|                                                      | Elav <sup>C155</sup> -Gal4 >2N4R              | 0.667 ± 0.454     | 8.3850         | <b>0.0047</b> |
| <b>48 Hours</b>                                      | Elav <sup>C155</sup> -Gal4> w <sup>1118</sup> | 2 ± 0.816         |                |               |
|                                                      | Elav <sup>C155</sup> -Gal4 >0N3R              | 4 ± 1.558         | 0.8344         | 0.3632        |
|                                                      | Elav <sup>C155</sup> -Gal4 >1N3R              | 4 ± 1.215         | 0.8344         | 0.3632        |
|                                                      | Elav <sup>C155</sup> -Gal4 >2N3R              | 5.333 ± 1.420     | 2.3179         | 0.1311        |

|          |                                                |                |        |                |
|----------|------------------------------------------------|----------------|--------|----------------|
| 52 Hours | Elav <sup>C155</sup> -Gal4 >0N4R               | 11.333 ± 1.241 | 18.172 | <b>4.65e-5</b> |
|          | Elav <sup>C155</sup> -Gal4 >1N4R               | 16.667 ± 2.051 | 44.874 | <b>1.33e-9</b> |
|          | Elav <sup>C155</sup> -Gal4 >2N4R               | 13.333 ± 2.108 | 26.794 | <b>1.20e-6</b> |
|          |                                                |                |        |                |
|          | Elav <sup>C155</sup> -Gal4 >0N3R               | 4 ± 1.558      |        |                |
|          | Elav <sup>C155</sup> -Gal4 >1N3R               | 4 ± 1.215      | 0      | 1              |
|          | Elav <sup>C155</sup> -Gal4 >2N3R               | 5.333 ± 1.420  | 0.3709 | 0.5439         |
|          | Elav <sup>C155</sup> -Gal4 >0N4R               | 11.333 ± 1.241 | 11.218 | <b>0.0011</b>  |
|          | Elav <sup>C155</sup> -Gal4 >1N4R               | 16.667 ± 2.051 | 33.470 | <b>8.67e-8</b> |
|          | Elav <sup>C155</sup> -Gal4 >2N4R               | 13.333 ± 2.108 | 18.172 | <b>4.64e-5</b> |
|          |                                                |                |        |                |
|          | Elav <sup>C155</sup> -Gal4 >1N3R               | 4 ± 1.215      |        |                |
|          | Elav <sup>C155</sup> -Gal4 >2N3R               | 5.333 ± 1.420  | 0.3709 | 0.5439         |
|          | Elav <sup>C155</sup> -Gal4 >0N4R               | 11.333 ± 1.241 | 11.218 | <b>0.0011</b>  |
|          | Elav <sup>C155</sup> -Gal4 >1N4R               | 16.667 ± 2.051 | 33.470 | <b>8.66e-8</b> |
|          | Elav <sup>C155</sup> -Gal4 >2N4R               | 13.333 ± 2.108 | 18.172 | <b>4.64e-5</b> |
|          |                                                |                |        |                |
|          | Elav <sup>C155</sup> -Gal4 >2N3R               | 5.333 ± 1.420  |        |                |
|          | Elav <sup>C155</sup> -Gal4 >0N4R               | 11.333 ± 1.241 | 7.5099 | <b>0.0073</b>  |
|          | Elav <sup>C155</sup> -Gal4 >1N4R               | 16.667 ± 2.051 | 26.795 | <b>1.20e-6</b> |
|          | Elav <sup>C155</sup> -Gal4 >2N4R               | 13.333 ± 2.108 | 13.350 | <b>0.0004</b>  |
|          |                                                |                |        |                |
|          | Elav <sup>C155</sup> -Gal4 >0N4R               | 11.333 ± 1.241 |        |                |
|          | Elav <sup>C155</sup> -Gal4 >1N4R               | 16.667 ± 2.051 | 5.9338 | <b>0.0167</b>  |
|          | Elav <sup>C155</sup> -Gal4 >2N4R               | 13.333 ± 2.108 | 0.8344 | 0.3632         |
|          |                                                |                |        |                |
|          | Elav <sup>C155</sup> -Gal4 >1N4R               | 16.667 ± 2.051 |        |                |
|          | Elav <sup>C155</sup> -Gal4 >2N4R               | 13.333 ± 2.108 | 2.3179 | 0.1311         |
|          |                                                |                |        |                |
|          | Elav <sup>C155</sup> -Gal4 > w <sup>1118</sup> | 2.667 ± 0.826  |        |                |
|          | Elav <sup>C155</sup> -Gal4 >0N3R               | 5.333 ± 1.791  | 1.0228 | 0.3143         |
|          | Elav <sup>C155</sup> -Gal4 >1N3R               | 7.333 ± 1.453  | 3.1324 | 0.0799         |
|          | Elav <sup>C155</sup> -Gal4 >2N3R               | 8.333 ± 1.992  | 4.6187 | <b>0.0341</b>  |
|          | Elav <sup>C155</sup> -Gal4 >0N4R               | 15 ± 1.618     | 21.879 | <b>9.30e-6</b> |
|          | Elav <sup>C155</sup> -Gal4 >1N4R               | 20.333 ± 2.153 | 44.893 | <b>1.32e-9</b> |
|          | Elav <sup>C155</sup> -Gal4 >2N4R               | 15.667 ± 2.667 | 24.308 | <b>3.35e-6</b> |
|          |                                                |                |        |                |
|          | Elav <sup>C155</sup> -Gal4 >0N3R               | 5.333 ± 1.791  |        |                |
|          | Elav <sup>C155</sup> -Gal4 >1N3R               | 7.333 ± 1.453  | 0.5753 | 0.4500         |
|          | Elav <sup>C155</sup> -Gal4 >2N3R               | 8.333 ± 1.992  | 1.2945 | 0.2580         |
|          | Elav <sup>C155</sup> -Gal4 >0N4R               | 15 ± 1.618     | 13.441 | <b>0.0004</b>  |
|          | Elav <sup>C155</sup> -Gal4 >1N4R               | 20.333 ± 2.153 | 32.363 | <b>1.33e-7</b> |
|          | Elav <sup>C155</sup> -Gal4 >2N4R               | 15.667 ± 2.667 | 15.358 | <b>0.0002</b>  |
|          |                                                |                |        |                |
|          | Elav <sup>C155</sup> -Gal4 >1N3R               | 7.333 ± 1.453  |        |                |
|          | Elav <sup>C155</sup> -Gal4 >2N3R               | 8.333 ± 1.992  | 0.1438 | 0.7053         |
|          | Elav <sup>C155</sup> -Gal4 >0N4R               | 15 ± 1.618     | 8.4543 | <b>0.0045</b>  |
|          | Elav <sup>C155</sup> -Gal4 >1N4R               | 20.333 ± 2.153 | 24.308 | <b>3.35e-6</b> |

|          |                                                |                |        |                 |
|----------|------------------------------------------------|----------------|--------|-----------------|
| 58 Hours | Elav <sup>C155</sup> -Gal4 >2N4R               | 15.667 ± 2.667 | 9.9886 | <b>0.0021</b>   |
|          |                                                |                |        |                 |
|          | Elav <sup>C155</sup> -Gal4 >2N3R               | 8.333 ± 1.992  |        |                 |
|          | Elav <sup>C155</sup> -Gal4 >0N4R               | 15 ± 1.618     | 6.3927 | <b>0.0131</b>   |
|          | Elav <sup>C155</sup> -Gal4 >1N4R               | 20.333 ± 2.153 | 20.712 | <b>1.53e-5</b>  |
|          | Elav <sup>C155</sup> -Gal4 >2N4R               | 15.667 ± 2.667 | 7.7352 | <b>0.0065</b>   |
|          |                                                |                |        |                 |
|          | Elav <sup>C155</sup> -Gal4 >0N4R               | 15 ± 1.618     |        |                 |
|          | Elav <sup>C155</sup> -Gal4 >1N4R               | 20.333 ± 2.153 | 4.0913 | <b>0.0458</b>   |
|          | Elav <sup>C155</sup> -Gal4 >2N4R               | 15.667 ± 2.667 | 0.0639 | 0.8009          |
|          |                                                |                |        |                 |
|          | Elav <sup>C155</sup> -Gal4 >1N4R               | 20.333 ± 2.153 |        |                 |
|          | Elav <sup>C155</sup> -Gal4 >2N4R               | 15.667 ± 2.667 | 3.1324 | 0.0799          |
|          |                                                |                |        |                 |
|          | Elav <sup>C155</sup> -Gal4 > w <sup>1118</sup> | 3.667 ± 1.031  |        |                 |
|          | Elav <sup>C155</sup> -Gal4 >0N3R               | 8 ± 1.746      | 1.3728 | 0.2442          |
|          | Elav <sup>C155</sup> -Gal4 >1N3R               | 12.333 ± 2.062 | 5.4914 | <b>0.0211</b>   |
|          | Elav <sup>C155</sup> -Gal4 >2N3R               | 14 ± 3.207     | 7.8065 | <b>0.0063</b>   |
|          | Elav <sup>C155</sup> -Gal4 >0N4R               | 21.333 ± 2.557 | 22.818 | <b>6.25e-6</b>  |
|          | Elav <sup>C155</sup> -Gal4 >1N4R               | 28.667 ± 2.947 | 45.694 | <b>1.002e-9</b> |
|          | Elav <sup>C155</sup> -Gal4 >2N4R               | 22 ± 3.742     | 24.573 | <b>2.999e-6</b> |
|          |                                                |                |        |                 |
|          | Elav <sup>C155</sup> -Gal4 >0N3R               | 8 ± 1.746      |        |                 |
|          | Elav <sup>C155</sup> -Gal4 >1N3R               | 12.333 ± 2.062 | 1.3728 | 0.2442          |
|          | Elav <sup>C155</sup> -Gal4 >2N3R               | 14 ± 3.207     | 2.6320 | 0.1079          |
|          | Elav <sup>C155</sup> -Gal4 >0N4R               | 21.333 ± 2.557 | 12.997 | <b>0.0005</b>   |
|          | Elav <sup>C155</sup> -Gal4 >1N4R               | 28.667 ± 2.947 | 31.226 | <b>2.06e-7</b>  |
|          | Elav <sup>C155</sup> -Gal4 >2N4R               | 22 ± 3.742     | 14.329 | <b>0.0003</b>   |
|          |                                                |                |        |                 |
|          | Elav <sup>C155</sup> -Gal4 >1N3R               | 12.333 ± 2.062 |        |                 |
|          | Elav <sup>C155</sup> -Gal4 >2N3R               | 14 ± 3.207     | 0.2031 | 0.6532          |
|          | Elav <sup>C155</sup> -Gal4 >0N4R               | 21.333 ± 2.557 | 5.9219 | <b>0.0168</b>   |
|          | Elav <sup>C155</sup> -Gal4 >1N4R               | 28.667 ± 2.947 | 19.504 | <b>2.59e-5</b>  |
|          | Elav <sup>C155</sup> -Gal4 >2N4R               | 22 ± 3.742     | 6.8317 | <b>0.0103</b>   |
|          |                                                |                |        |                 |
|          | Elav <sup>C155</sup> -Gal4 >2N3R               | 14 ± 3.207     |        |                 |
|          | Elav <sup>C155</sup> -Gal4 >0N4R               | 21.333 ± 2.557 | 3.9317 | <b>0.0502</b>   |
|          | Elav <sup>C155</sup> -Gal4 >1N4R               | 28.667 ± 2.947 | 15.727 | <b>0.0001</b>   |
|          | Elav <sup>C155</sup> -Gal4 >2N4R               | 22 ± 3.742     | 4.6790 | <b>0.0330</b>   |
|          |                                                |                |        |                 |
|          | Elav <sup>C155</sup> -Gal4 >0N4R               | 21.333 ± 2.557 |        |                 |
|          | Elav <sup>C155</sup> -Gal4 >1N4R               | 28.667 ± 2.947 | 3.9317 | 0.0502          |
|          | Elav <sup>C155</sup> -Gal4 >2N4R               | 22 ± 3.742     | 0.0325 | 0.8573          |
|          |                                                |                |        |                 |
|          | Elav <sup>C155</sup> -Gal4 >1N4R               | 28.667 ± 2.947 |        |                 |
|          | Elav <sup>C155</sup> -Gal4 >2N4R               | 22 ± 3.742     | 3.2493 | 0.0745          |
|          |                                                |                |        |                 |
|          | Elav <sup>C155</sup> -Gal4 > w <sup>1118</sup> | 18.667 ± 3.856 |        |                 |

|          |                                  |                |        |                 |
|----------|----------------------------------|----------------|--------|-----------------|
| 75 Hours | Elav <sup>C155</sup> -Gal4 >0N3R | 35.333 ± 2.207 | 10.337 | <b>0.0018</b>   |
|          | Elav <sup>C155</sup> -Gal4 >1N3R | 53 ± 4.163     | 43.868 | <b>1.90e-9</b>  |
|          | Elav <sup>C155</sup> -Gal4 >2N3R | 49.667 ± 4.792 | 35.764 | <b>3.63e-8</b>  |
|          | Elav <sup>C155</sup> -Gal4 >0N4R | 57.333 ± 3.712 | 55.641 | <b>3.54e-11</b> |
|          | Elav <sup>C155</sup> -Gal4 >1N4R | 58.667 ± 2.823 | 59.544 | <b>1.02e-11</b> |
|          | Elav <sup>C155</sup> -Gal4 >2N4R | 68.667 ± 3.501 | 93.038 | <b>7.11e-16</b> |
|          |                                  |                |        |                 |
|          | Elav <sup>C155</sup> -Gal4 >0N3R | 35.333 ± 2.207 |        |                 |
|          | Elav <sup>C155</sup> -Gal4 >1N3R | 53 ± 4.163     | 11.615 | <b>0.0009</b>   |
|          | Elav <sup>C155</sup> -Gal4 >2N3R | 49.667 ± 4.792 | 7.6456 | <b>0.0068</b>   |
|          | Elav <sup>C155</sup> -Gal4 >0N4R | 57.333 ± 3.712 | 18.012 | <b>4.99e-5</b>  |
|          | Elav <sup>C155</sup> -Gal4 >1N4R | 58.667 ± 2.823 | 20.262 | <b>1.86e-5</b>  |
|          | Elav <sup>C155</sup> -Gal4 >2N4R | 68.667 ± 3.501 | 41.350 | <b>4.66e-9</b>  |
|          |                                  |                |        |                 |
|          | Elav <sup>C155</sup> -Gal4 >1N3R | 53 ± 4.163     |        |                 |
|          | Elav <sup>C155</sup> -Gal4 >2N3R | 49.667 ± 4.792 | 0.4135 | 0.5217          |
|          | Elav <sup>C155</sup> -Gal4 >0N4R | 57.333 ± 3.712 | 0.6988 | 0.4052          |
|          | Elav <sup>C155</sup> -Gal4 >1N4R | 58.667 ± 2.823 | 1.1950 | 0.2770          |
|          | Elav <sup>C155</sup> -Gal4 >2N4R | 68.667 ± 3.501 | 9.1343 | <b>0.0032</b>   |
|          |                                  |                |        |                 |
|          | Elav <sup>C155</sup> -Gal4 >2N3R | 49.667 ± 4.792 |        |                 |
|          | Elav <sup>C155</sup> -Gal4 >0N4R | 57.333 ± 3.712 | 2.1874 | 0.1423          |
|          | Elav <sup>C155</sup> -Gal4 >1N4R | 58.667 ± 2.823 | 3.0144 | 0.0857          |
|          | Elav <sup>C155</sup> -Gal4 >2N4R | 68.667 ± 3.501 | 13.435 | <b>0.0004</b>   |
|          |                                  |                |        |                 |
|          | Elav <sup>C155</sup> -Gal4 >0N4R | 57.333 ± 3.712 |        |                 |
|          | Elav <sup>C155</sup> -Gal4 >1N4R | 58.667 ± 2.823 | 0.0662 | 0.7975          |
|          | Elav <sup>C155</sup> -Gal4 >2N4R | 68.667 ± 3.501 | 4.7801 | <b>0.0312</b>   |
|          |                                  |                |        |                 |
|          | Elav <sup>C155</sup> -Gal4 >1N4R | 58.667 ± 2.823 |        |                 |
|          | Elav <sup>C155</sup> -Gal4 >2N4R | 68.667 ± 3.501 | 3.7215 | 0.0566          |
|          |                                  |                |        |                 |

**Supplemental Table S8.**

Log-rank tests were used to compare survival curves of the indicated genotypes with that of *elav<sup>C155</sup>-GAL4* heterozygotes (*w<sup>1118</sup>*) as indicated. Significant differences are highlighted in bold.

| Statistical details from Figure 8 |                                                                                                                   |               |                   |                   |               |                   |
|-----------------------------------|-------------------------------------------------------------------------------------------------------------------|---------------|-------------------|-------------------|---------------|-------------------|
| Genotype<br>DAY                   | Log-Rank comparison <i>Elav<sup>C155</sup>-Gal4&gt;w<sup>1118</sup></i> vs <i>Elav<sup>C155</sup>-Gal4&gt;TAU</i> |               |                   |                   |               |                   |
|                                   | 0N3R                                                                                                              | 1N3R          | 2N3R              | 0N4R              | 1N4R          | 2N4R              |
| 1                                 | 0                                                                                                                 | 0             | 0                 | 0                 | 0             | 0                 |
| 3                                 | 0.0726                                                                                                            | 0.2878        | 0.753             | 0.9483            | 0.0637        | 0.2878            |
| 5                                 | 0.4067                                                                                                            | 0.1996        | 0.5115            | 0.9929            | 0.169         | 0.1753            |
| 7                                 | 0.1797                                                                                                            | <b>0.0224</b> | 0.5792            | 0.2357            | 0.9052        | 0.117             |
| 9                                 | 0.2614                                                                                                            | <b>0.0224</b> | 0.5792            | 0.2357            | 0.4612        | 0.117             |
| 11                                | 0.2614                                                                                                            | <b>0.0224</b> | 0.2034            | 0.2357            | 0.4612        | 0.117             |
| 13                                | 0.2888                                                                                                            | <b>0.0153</b> | 0.3941            | 0.1526            | 0.5657        | 0.099             |
| 15                                | 0.1131                                                                                                            | <b>0.0045</b> | 0.2957            | 0.0628            | 0.3228        | 0.016             |
| 17                                | 0.0862                                                                                                            | <b>0.0306</b> | 0.3215            | 0.1376            | 0.3691        | 0.0247            |
| 19                                | 0.0862                                                                                                            | <b>0.0306</b> | 0.164             | 0.1829            | 0.3561        | 0.0582            |
| 21                                | 0.0134                                                                                                            | <b>0.0134</b> | 0.4224            | 0.0765            | 0.7528        | 0.0229            |
| 23                                | 0.5548                                                                                                            | 0.1904        | 0.2785            | 0.4116            | 0.1821        | 0.4713            |
| 25                                | <b>&lt;0.0001</b>                                                                                                 | 0.7236        | 0.1838            | <b>0.0121</b>     | 0.0952        | <b>&lt;0.0001</b> |
| 27                                | <b>&lt;0.0001</b>                                                                                                 | <b>0.0003</b> | <b>&lt;0.0001</b> | <b>&lt;0.0001</b> | <b>0.0018</b> | <b>&lt;0.0001</b> |
| 29                                | <b>0.001</b>                                                                                                      | 0.0846        | <b>0.0024</b>     | <b>0.0013</b>     | 0.0638        | <b>0.0003</b>     |
| 31                                | <b>0.007</b>                                                                                                      | 0.1054        | <b>0.0027</b>     | <b>0.0002</b>     | 0.2564        | <b>0.0027</b>     |
| 33                                | 0.0726                                                                                                            | 0.0726        | 0.3974            | 0.0825            | 0.4534        | 0.0726            |
| 35                                | 0                                                                                                                 | 0             | 0                 | 0                 | 0             | 0                 |
